# Supplementary material for: Mechanism‐Guided Design of Highly Efficient Protein Secretion and Lipid Conversion for Biomanufacturing and Biorefining
Source: PubMed Central journal article supplement (PMC6662401; doi:10.1002/advs.201801980), 2019-05-01
Supplement: ADVS-6-1801980-s001.pdf [file ADVS-6-1801980-s001.pdf]

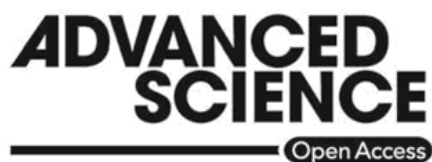

## Supporting Information

for *Adv. Sci.*, DOI: 10.1002/adv.201801980

### Mechanism-Guided Design of Highly Efficient Protein Secretion and Lipid Conversion for Biomanufacturing and Biorefining

*Shangxian Xie, Su Sun, Furong Lin, Muzi Li, Yunqiao Pu, Yanbing Cheng, Bing Xu, Zhihua Liu, Leonardo da Costa Sousa, Bruce E. Dale, Arthur J. Ragauskas, Susie Y. Dai,\* and Joshua S. Yuan\**

## Supplementary Information

### Mechanism-Guided Design of Highly Efficient Protein Secretion and Lipid Conversion for Biomanufacturing and Biorefining

Shangxian Xie, Su Sun, Furong Lin, Muzi Li, Yunqiao Pu, Yanbing Cheng, Bing Xu, Leonardo da Costa Souse, Bruce E. Dale, Arthur J. Ragauskas, Susie Y. Dai, and Joshua S. Yuan

|                                                                                                                                                                                   |    |
|-----------------------------------------------------------------------------------------------------------------------------------------------------------------------------------|----|
| <b>Supplementary Methods</b> .....                                                                                                                                                | 3  |
| <b>Strain and plasmids</b> .....                                                                                                                                                  | 3  |
| <b>Plasmid transformation into <i>R. opacus</i> PD630</b> .....                                                                                                                   | 4  |
| <b>Total protein extraction for proteomics</b> .....                                                                                                                              | 4  |
| <b>MudPIT based shot-gun proteomics</b> .....                                                                                                                                     | 5  |
| <b>Proteomics data analysis</b> .....                                                                                                                                             | 6  |
| <b>Laccase activity</b> .....                                                                                                                                                     | 7  |
| <b>Lignin concentration analysis by Prussian Blue assay</b> .....                                                                                                                 | 7  |
| <b>Lignin characterization by <sup>31</sup>P NMR</b> .....                                                                                                                        | 8  |
| <b>Total lipid extraction</b> .....                                                                                                                                               | 8  |
| <b>Supplementary Tables and Figures</b> .....                                                                                                                                     | 9  |
| <b>Table S1.</b> The laccase activities from different microbes.....                                                                                                              | 9  |
| <b>Table S2.</b> The promoter/RBSs used in this study .....                                                                                                                       | 10 |
| <b>Table S3.</b> The sequence of signal peptides used in this study .....                                                                                                         | 11 |
| <b>Table S4.</b> The expression profile of proteins in lipid biosynthesis pathway .....                                                                                           | 13 |
| <b>Table S5.</b> The list of the strains and plasmids used in this study .....                                                                                                    | 14 |
| <b>Table S6.</b> The expression abundance of proteins involved in aromatic compound catabolism.....                                                                               | 16 |
| <b>Figure S1.</b> The overview of proteomics analysis of <i>R. opacus</i> PD630 grown on 1% glucose or lignin as carbon source.....                                               | 19 |
| <b>Figure S2.</b> The growth curve of <i>R. opacus</i> PD630 grown on 1% glucose or lignin as carbon source. ...                                                                  | 20 |
| <b>Figure S3.</b> The total protein of bacteria <i>R. opacus</i> PD630 grown in 1% of lignin as carbon source. ....                                                               | 21 |
| <b>Figure S4.</b> The map of vector pBSNC9031_La used for laccase secretory production in <i>R. opacus</i> PD630 .....                                                            | 22 |
| <b>Figure S5.</b> The fluorescence intensity of GFP in the engineered strain with different promoters/RBSs. ....                                                                  | 23 |
| <b>Figure S6.</b> The comparison of yield for total secretory proteins among the engineered strain PD630_La and control strain PD630 on 1% glucose medium on the fourth day. .... | 24 |
| <b>Figure S7.</b> The comparison of total secreted proteins between the engineered strain PD630_La and wild type PD630 on SDS-PAGE. ....                                          | 25 |
| <b>Figure S8.</b> The comparison of total secreted proteins in the culture supernatant between the engineered strain PD630_La and control strains on SDS-PAGE.....                | 26 |
| <b>Figure S9.</b> The yield of secretory protein by the engineered strain PD630_La after 7-days of growth on media with different carbon and nitrogen concentrations. ....        | 27 |

|                                                                                                                                                                            |    |
|----------------------------------------------------------------------------------------------------------------------------------------------------------------------------|----|
| <b>Figure S10.</b> Hierarchical cluster of differentially expressed proteins involved in aromatic compound catabolism. ....                                                | 28 |
| <b>Figure S11.</b> The lipid accumulation of <i>R. opacus</i> PD630 grown on 1% glucose. ....                                                                              | 29 |
| <b>Figure S12.</b> The comparison of lipid yield (left) and cell biomass yield (right) between the engineered strain PD630_Fa and control strain. ....                     | 30 |
| <b>Figure S13.</b> The comparison of cell biomass yield (left) and lipid yield (right) between the <i>fasI</i> mutant strain PD630_Δ <i>fasI</i> and wild type PD630. .... | 31 |
| <b>Figure S14.</b> The lipid content of the strain with overexpression of <i>fasI</i> and <i>atf2</i> , respectively.....                                                  | 32 |
| <b>Figure S15.</b> The laccase activity of co-transformed strain PD630_FL during fermentation on insoluble alkali lignin. ....                                             | 33 |
| <b>Figure S16.</b> The lignin consumption ratio between the engineered strain PD630_FL and control strain. ....                                                            | 34 |
| <b>Figure S17.</b> The molecular weight analysis of the lignin by GPC. ....                                                                                                | 35 |
| <b>Reference</b> .....                                                                                                                                                     | 36 |

## Supplementary Methods

### Strain and plasmids

*Rhodococcus opacus* PD630 (DSMZ 44193) was purchased from the German Collection of Microorganisms and Cell Cultures. The sequence of small laccase from *Streptomyces coelicolor* was synthesized by GenScript with codon optimization according to the codon usage table of *R. opacus* PD630. The *E. coli-Rhodococcus* shuttle vector pBSNC9031 was constructed by integrating pBluescript SK with thiostrepton resistance gene *tsr* from *Streptomyces azureus* and synthesized pNC903 sequence (by GenScript), which contained the *Rhodococcus* plasmid replication origin.<sup>[1]</sup> The shuttle vector was used for establishing the secretory heterologous expression system and the overexpression of fatty acid synthase. For the construction of the engineered strain PD360\_FL, the laccase secretion module and fatty acid biosynthesis module were co-transformed. The optimized laccase secretion modules was expressed in the *Escherichia coli-Rhodococcus* shuttle vector pT2, which contained the *Rhodococcus* plasmid replication origin from pTip-RT1<sup>[2]</sup>, *E. coli* plasmid replication origin, and apramycin resistance gene from pSET152.<sup>[3]</sup> The strains and plasmids used in this study were list in Supplementary Table 4. For *fasI* gene disruption, the plasmid pK18mob modified from pK18mobsacB by deleting the *sacB* cassette. The DNA of plasmid pK18mob with the kanamycin cassette was inserted to the *fasI* by homologous recombination with the DNA fragment amplified from *fasI* gene with the primers FASI\_2170 (5'-GACATCCACGAGATCGACAAC-3') and FASI\_3162 (5'-AACGGTGATGGTGATCTGGAC -3').

### **Plasmid transformation into *R. opacus* PD630**

Plasmids were introduced into *R. opacus* PD630 by electroporation using electroporator according to the modified protocol from a previous publication.<sup>[4]</sup> To prepare electrocompetent cells of *R. opacus* PD630, *R. opacus* PD630 was first pre-cultured overnight in Tryptic Soy Broth (TSB), and 0.1 mL of the pre-culture were added to 10 mL of TSB supplemented with 0.5% (w/v) glycine in a 50-mL Erlenmeyer flask. The cells were cultured at 28°C to an optical density of 0.5 at 600nm, and then were harvested and washed twice with ice-cold HS buffer containing 7 mM HEPES and 252 mM sucrose (pH 7.0). The competent cells were concentrated by 10-fold in ice-cold HS buffer. Immediately before electroporation, 400 µl of competent cells were mixed with DNA (final concentration 0.1–1 µg/mL) and pre-incubated at 40°C for 10 min. The electroporation was performed in electrocuvettes with gaps of 2 mm using the following settings: 2.5 kV/cm, 600 Ω, and 50 µF. Pulsed cells were immediately diluted with 1 mL of TSB and incubated at 28°C for 4 h before they were plated on appropriate selection medium.

### **Total protein extraction for proteomics**

For the intracellular proteomics, the total protein was extracted from the bacteria grown on 1% glucose or 1% insoluble alkali lignin as carbon source at different growth stages including middle log phase, early stationary phase, and middle stationary phase, as shown in Figure S2. The strain was harvested from the 50mL culture medium by centrifuging at 5000 ×g. 5 mL Alkali-SDS buffer (5% SDS; 50 mM Tris-HCl, pH 8.5; 0.15 M NaCl; 0.1 mM EDTA; 1 mM MgCl<sub>2</sub>; 50 mM Dithiothreitol)<sup>[5]</sup> was added and boiled for 10 min in a water bath. The clear supernatant of the boiled sample was collected by centrifugation at 3000 ×g for 10 min and decanted into a fresh tube. Chilled 100% trichloroacetic acid (TCA) was added to a final concentration of 20%. The solution was mixed well and incubated at -20 °C for 4 hours. The

pelletized proteins were collected by centrifuging at  $16,000 \times g$  for 30 min at 4 °C. The pellet was harvested and washed twice with 1 mL chilled acetone followed by centrifugation at  $16,000 \times g$  for 30 min at 4 °C.

For secretome proteomics, the total secretory proteins were extracted from the supernatant of bacterial growth medium on 1% glucose. The aforementioned TCA and acetone extraction method was used to prepare the extracellular proteins.

The extracted protein pellet was air-dried and then dissolved in a solution buffer containing 7 M urea, 2 M thiourea, 40 mM trizma base, and 1% 3-(4-Heptyl)phenyl-3-hydroxypropyl dimethylammoniopropanesulfonate (C7BzO). The extracted protein was stored at -80°C prior to LC-MS/MS proteomics analysis.

### **MudPIT based shot-gun proteomics**

MudPIT-based shot-gun proteomics was carried out to analyze the extracted protein as described in previous publications.<sup>[6, 7]</sup> Approximately 100 µg of protein was digested by Trypsin Gold, Mass Spectrometry Grade (Promega, WI, USA) with 1:40 w/w at 37 °C for 24 h. The digested peptides were desalted using a Sep-Pak plus C18 column (Waters Limited, ON, Canada) and then loaded onto a biphasic (strong cation exchange/reversed phase) capillary column using a pressure tank. The 2D back column was composed of 5cm of C18 reverse phase resin (C18-AQ, The Nest Group, Inc, Southborough, MA, USA) and 3 cm of strong cation exchange (SCX) resin PolySULFOETHYL A, (The Nest Group, Inc, Southborough, MA, USA). The back column was then connected to a 15-cm-long 100 µm-ID C18 column (packed in house with the same C18 reverse phase in the back column) and sprayed through a SilicaTip (New objective, Inc, Woburn, MA). The experiments of two-dimensional liquid chromatography separation and tandem mass

spectrometry followed the protocols previously described by Washburn *et al.*<sup>[8]</sup> Basically, before SCX separation, a 1 h RP gradient from 100% Solvent A (95% H<sub>2</sub>O, 5% ACN, and 0.1% formic acid) to 100% Solvent B (30% H<sub>2</sub>O, 70% ACN, and 0.1% formic acid) was configured to move peptides from C18 resin to SCX resin in the back column. The SCX LC separation was performed with eleven salt pulses containing increasing concentrations of ammonium acetate. Each salt pulse was followed by a 2 h reverse phase gradient from 100% Solvent A to 60% Solvent B. The LC eluent was directly nanosprayed into a linear ion trap mass spectrometer, Finnigan LTQ (Thermo Fisher Scientific, San Jose, CA). The mass spectrometer was set to the data-dependent acquisition mode, and full mass spectra were recorded on the peptides over a 300-1700 m/z range, followed by five tandem mass (MS/MS) events for the most abundant ions from the first MS analysis. The Xcalibur data system (Thermo Fisher Scientific, San Jose, CA) was used to control the LC-LTQ system and collect the data.

### **Proteomics data analysis**

Tandem mass spectra were extracted from the raw files and converted into the MS2 file. The MS2 file was searched against the *R. opacus PD630* protein database established based on the sequences from previous publication.<sup>[9]</sup> A ProLuCID algorithm was used to search for data.<sup>[10]</sup> The validity of peptide/spectrum matches was assessed in DTASelect2.0 using a 0.05 false discovery cutoff, a cross-correlation score (XCorr) larger than 1, and normalized difference in cross-correlation scores (DeltaCN) larger than 0.08. Proteins with more than two peptides were identified as detected and were recorded.<sup>[6, 11]</sup>

### **Laccase activity**

The supernatant of the culture medium was collected by centrifugation and used for laccase activity and extracellular protein concentration assay. The laccase activity assay was determined with 2,2'-azino-bis(3-ethylbenzothiazoline-6-sulphonic acid) (ABTS) as the substrate. The reaction mixtures contained 250  $\mu\text{L}$  6 mM ABTS in 50 mM sodium acetate buffer (pH = 5.0) and 50  $\mu\text{L}$  culture supernatant. Oxidation of ABTS was monitored by the increase in A420 ( $\epsilon = 36,000 \text{ M}^{-1} \text{ cm}^{-1}$ ). One unit of enzyme activity was defined as the amount of enzyme required to oxidize 1  $\mu\text{mol}$  of ABTS per min.

### **Lignin concentration analysis by Prussian Blue assay**

Lignin concentration was measured by Prussian Blue assay as described in our previous study.<sup>[12]</sup> The pH for the sample was adjusted to 12.5 with 10 M NaOH to completely dissolve the lignin. In order to completely dissolve lignin, the lignin sample was mixed at speed of 180 rpm for 1 h. The total volume was adjusted to 100 mL by adding RM minimum medium. The samples were further diluted to an optimal concentration using ddH<sub>2</sub>O to adjust the final absorbance at 700 nm to be within the range of 0.7-1.5. Approximately 1.5mL of the diluted samples was transferred into 2 mL tubes. 100  $\mu\text{L}$  of 8 mM K<sub>3</sub>Fe(CN)<sub>6</sub> was added into the tube and followed by the immediate addition of 100  $\mu\text{L}$  0.1 M FeCl<sub>3</sub>. The samples were mixed thoroughly by shaking the tube for 5 minutes. The samples were transferred to 1 cm cuvette to obtain the absorbance at 700 nm by spectrophotometer, using the ddH<sub>2</sub>O sample as blank control. Standard curve was established with the same reagents and known concentration of lignin. All experiments were carried out in triplicate.



### **Lignin characterization by $^{31}\text{P}$ NMR**

For quantitative  $^{31}\text{P}$  NMR analysis, 20 mg of lignin was dissolved in 500  $\mu\text{L}$  of pyridine/ $\text{CDCl}_3$ (1.6/1.0 v/v) solvent containing chromium acetylacetonate (relaxation agent) and endo-N-hydroxy-5-norbornene-2,3-dicarboximide (NHND, internal standard), then derivatized with 2-chloro-4,4,5,5-tetramethyl-1,3,2-dioxaphospholane. The spectrum was obtained using an inverse-gated decoupling pulse sequence (Waltz-16), a  $90^\circ$  pulse, and a 25 s pulse delay. 128 scans were accumulated for each sample. NMR data were processed using the software of TopSpin 2.1 (Bruker BioSpin) and MestreNova (Mestre Laboratories) packages.<sup>[13]</sup>

### **Total lipid extraction**

The total lipid of *R. opacus* PD630 after lignin fermentation was extracted in the form of fatty acid methyl ester (FAME) according to the method described in our previous study.<sup>[14]</sup> The bacteria cells were harvested by centrifugation at 8000g after lignin fermentation. The collected samples were lyophilized for 24 hours and incubated with 20 mL methanol at  $65^\circ\text{C}$  for 30 min. 1 mL of 10 M KOH was then added, and the reaction was incubated at  $65^\circ\text{C}$  for 2 hours. During the incubation, the cap was loosened to release the pressure every 30 min. After the incubation, the sample was moved out from water bath and cooled down to room temperature. 1 mL of sulfuric acid was then added drop by drop, and the reaction was further incubated at  $65^\circ\text{C}$  for another 2 h. 8 mL of hexane was added and incubated for 5 min to extract the lipid. Shaking during the incubation to ensure the proper mixture. The samples were centrifuged at 3500g for 5 min to separate the reaction into two phases. The hexane phase containing the methylated esters was collected to pre-weighted glass tubes. This hexane extraction step was repeated twice. The hexane was then evaporated under nitrogen gas stream and the lipid yield was calculated according to tube weight change.

## Supplementary Tables and Figures

**Table S1.** The laccase activities from different microbes.

| Strain                             | Laccase Activity | Protein location | Substrate for activity assay | Reference |
|------------------------------------|------------------|------------------|------------------------------|-----------|
| <i>E. coli</i> BL21(DE3) pLysE     | 13.3 U/mg        | Intracellular    | ABTS                         | [15]      |
| <i>E. coli</i> BL21(DE3)           | 127.78 U/mg      | Intracellular    | ABTS                         | [16]      |
| <i>P. pastoris</i> with pHBM905BDM | 41 U/mL          | Extracellular    | ABTS                         | [17]      |
| <i>E. coli</i> BL21(DE3)           | 2.94 U/mg        | Intracellular    | ABTS                         | [18]      |
| <i>E. coli</i> .                   | 13 U/mg          | Intracellular    | ABTS                         | [19]      |
| <i>P. pastoris</i> strain GS115    | 5.33 U/mg        | Extracellular    | ABTS                         | [20]      |
| <i>E. coli</i> BL21(DE3)           | 16 U/mL          | Intracellular    | ABTS                         | [21]      |
| <i>P. capsici</i> strain Phyc12    | 84 U/mL          | Extracellular    | ABTS                         | [22]      |
| <i>Trametes versicolor</i>         | 0.080 U/mL       | Extracellular    | RB5                          | [23]      |
| <i>Fomes fomentarius</i>           | 0.080 U/mL       | Extracellular    | ABTS                         | [24]      |
| <i>Ganoderma sp.</i> En3           | 206 U/mg         | Extracellular    | ABTS                         | [25]      |
| <i>Trametes orientalis</i>         | 20.67 U/mg       | Extracellular    | ABTS                         | [26]      |
| <i>Trametes versicolor</i>         | 243.86 U/mg      | Extracellular    | ABTS                         | [27]      |
| <i>Pleurotus sajor-caju</i>        | 2.350 U/mL       | Extracellular    | ABTS                         | [28]      |
| <i>Pleurotus ostreatus</i>         | 0.522 U/mL       | Extracellular    | ABTS                         | [29]      |
| <i>Trametes versicolor</i>         | 0.629 U/mL       | Extracellular    | ABTS                         | [30]      |
| <i>Cerrena sp.</i>                 | 6.3 U/mL         | Extracellular    | ABTS                         | [31]      |
| <i>Trametes trogii</i> BAFC 463    | 5.740 U/mL       | Extracellular    | ABTS                         | [32]      |
| <i>Pleurotus ostreatus</i>         | 0.452 U/mL       | Extracellular    | DMP                          | [33]      |
| <i>Coriolopsis gallica</i>         | 0.250 U/mL       | Extracellular    | ABTS                         | [34]      |
| <i>Trametes versicolor</i>         | 0.045 U/mL       | Extracellular    | ABTS                         | [35]      |
| <i>Trametes sanguineus</i>         | 67.33 U/mg       | Extracellular    | ABTS                         | [36]      |
| <i>Trametes versicolor</i>         | 0.645 U/mL       | Extracellular    | ABTS                         | [37]      |
| <i>Nigrospora sp.</i> CBMAI 1328   | 0.025 U/mL       | Extracellular    | ABTS                         | [38]      |
| <i>Shiraia sp.</i> SUPER-H168      | 11 U/mL          | Extracellular    | DMP                          | [39]      |
| <i>Moniliophthora roreri</i>       | 0.281 U/mL       | Extracellular    | ABTS                         | [40]      |

**Table S2.** The promoter/RBSs used in this study

| <b>ID</b> | <b>Function</b>  | <b>sequence</b>                                                                                                                                                                                                                                                                                                                                                                                                                                                                                                                | <b>Source</b>                                                           |
|-----------|------------------|--------------------------------------------------------------------------------------------------------------------------------------------------------------------------------------------------------------------------------------------------------------------------------------------------------------------------------------------------------------------------------------------------------------------------------------------------------------------------------------------------------------------------------|-------------------------------------------------------------------------|
| P756      | Promoter and RBS | CCGGCGAGAACGACGAACGATCCCACCCAGGCGGACAG<br>CGACACCGCGACCCGCCTTCGGGGTGGCATCGGTGGGGG<br>TGGCGCGCAGCGGGGTGACCGCGAACTCCGGACGCGGC<br>GGTACGGGTCGCGGCGGTTCCGGCCGGCGTGGCGGCTG<br>CTCGGGTGTCTCACGCAGCGATCCTATCGACCTGCAGT<br>ACCGTGGCGGGCCGACGCGGGTCCGTGTCGGCGGCC<br>CCGAAGCACGCCGCCGAAACACGGCGCCCGAACAAAAT<br>GTGGGCATCCGGGAACAAATCTCCGCACCCCTCCGTTGA<br>GCCTTACGGCAACATGAGCGTGCAAGACTCAAGTTCGA<br>ATTGACTCCCGACGGTGTCTGGAGTGCAAACCTTGAGCGGA<br>GGGCGCTACTAAGCGCCAACATCGCAGTTCAGTAATGA<br>AAAACCTGCCACAGGACTGCAAAACGAAAGTGAGGAA<br>CACT | Upstream<br>sequence of gene<br>OPAG_07756 in<br><i>R. opacus</i> PD630 |
| P203      | Promoter and RBS | TCGTTTGTGTAACGCTGGAAGTGTCTGGCGACGATGTACG<br>TCGATGATGAGTCATCGTGACGGTGGTCTGGAAGTTCCG<br>TGGAAAACGTTCCGTGAGCGTTTGTGAGGGAAGTTCTGTG<br>TGACATACAGTCCACCGAGCGCAGTGTGACTTGGGAAGA<br>GGTCCGCTGCCGACCCGGCTTCATGCCCGGGCCGGCAGG<br>TCGCCTGTTCCCGACGGAATCCGCCGGAGCCGCCTAGT<br>GGCGGAGTCCGCAGACGAAGAGAGTGAGCAGTATTC                                                                                                                                                                                                                        | Upstream<br>sequence of gene<br>OPAG_09203 in<br><i>R. opacus</i> PD630 |
| P886      | Promoter and RBS | GCGAGTTCGGTTCGGACGATCGTCTGGCCACCCCGTCCC<br>GCGCCGAGCCTGCGGTAGCCGGAGCTGCCGACGGGGAC<br>GGCCACCGCTTCGAGGGTGGTGCCGGCCCCGGACGTGG<br>GAAGCGGCGCCGCGCCCGGTACTGCAACCCCCACGGG<br>CGTGCTTCGAATCCCACTGCCCCGATCGCCCCGAGTCCG<br>GCAAATGTCAGGAATTTACGCCGATTGATGTCAGACACC<br>AGGGGAACCTTAGGTGACGACCCGTGAGACAGGCCGAT<br>ATTCGGCTCGGCGCGGTCTACCACCCCTTCTCCTTGAG<br>CGTTGGCACTCTCACGTATAGAGTGCCAAGTGGCGCCGA<br>TCGAGCTCCGGCACCCGCGACGACGGGGTGT                                                                                                   | Upstream<br>sequence of gene<br>OPAG_04886 in<br><i>R. opacus</i> PD630 |
| Pbne      | Promoter and RBS | TACTCCGGGTACCTGTGCGGGCCGCCGGCGATGGTTCGAC<br>GCCGGAGTCAAGCGGTTCAAGCGCCGGCGCATGGCTCCT<br>CGACGCATCTTCCGGGAGAAGTTCACGCCCGCCGCGTGA<br>CGACCGCACCCCGATGCGTACGCCGAGGCCCTCCGAGCC<br>TCGGCGTACGCATGCCGGACACGTCTAGTCACTACTCG<br>GTAAATGCCTAGTGTGATGCAGCGCACAGGCTGCAAGA<br>GTGGAATTCATTGCCGACCCGGGCGCCCTCGCAGGGCG<br>CAAGCCCCGGAGATCTTGGAGGATCCC                                                                                                                                                                                         | Upstream<br>sequence of gene<br>benA in <i>R. jostii</i><br>RHA1        |
| R704      | RBS              | GACTAGCGGTGCGCTTGTGTGTCACCCCAATCCGGAGG<br>ATCACTTCGCA                                                                                                                                                                                                                                                                                                                                                                                                                                                                          | Upstream<br>sequence of gene<br>OPAG_00704 in                           |

|      |     |                                                       |                                                                         |
|------|-----|-------------------------------------------------------|-------------------------------------------------------------------------|
|      |     |                                                       | <i>R. opacus</i> PD630                                                  |
| R756 | RBS | AGTAATGAAAAACCTGCCACAGGACTGCAAAACGAAA<br>GTGAGGAACACT | Upstream<br>sequence of gene<br>OPAG_07756 in<br><i>R. opacus</i> PD630 |

**Table S3.** The sequence of signal peptides used in this study

| Signal peptide | Sequence                                                                                                                                                       | Source in <i>R. opacus</i> PD630 |
|----------------|----------------------------------------------------------------------------------------------------------------------------------------------------------------|----------------------------------|
| S0812          | ATGAATCGACGGCACTTCGGACGACGGGTCGCGGCAGGTCTGACCGCTGC<br>AGTAGCAGCGACGATGATGTTACCGGCGTCGTGTCGGCGCAGCCC                                                            | OPAG_00812                       |
| S0699          | ATGACGTCGCAGCGAAGGAGAACGATGGTCAACCGCACTGCAGCGGGTA<br>GGTACGGGGTGCGGTTTTCGCTCGCGGTCGCCCTGACGGCGGCGATTCCG<br>TGCCTCGGAGTCCAGGCGTCCGCTTCCGCCGATCCG                | OPAG_00699                       |
| S2359          | ATGCAGACAGGGACCAGCAGGGGCATGAAACGACTCGCCGGAGGCGCCG<br>CACTCGCTGCCGACGCCGCCACCGTAGCCGTGACCATGCCGGCGACG<br>GCGTCCGCAGCAACG                                        | OPAG_02359                       |
| S4280          | ATGAGCGAGAACCGAAAGACCGGCCTGCGCCGTGGAGCCCGCATTGCCG<br>GCCTTGGTGCCGCTGCGGCTGTAGTCTCGGCCTGATGTCCACGGGTGCG<br>GCCAACGCCGAC                                         | OPAG_04280                       |
| S2334          | ATGGTCTCTTCGGGCCACGCAGTGCCGCTGCTGCTAGAGATGGAGTGTC<br>CTTCGTGAAGCGAACCAGAGCTCTTGACGACGCGTCACTCGTCGGCGCGG<br>CCGTGACGTTGATCGCATTCCGCCGGCCCGGCCCGCGAATCCC         | OPAG_02334                       |
| S7191          | ATGGAACGTCGCGTTTCAGCACGCAAGGTCGCGCATCGACGAAGGATCGC<br>AGGCAGTCTGATCGCGCCCGGCGGTTGGGGCTGGCGGCGCTGCTCGCGA<br>CCCCGTGGTCGAACCCGGGTTACCGGCCACGACGGCGACA            | OPAG_07191                       |
| S4723          | ATGGACGGTATGAGCGTGATGCGACGCACGATCGCGGCGGCAACGGTCG<br>GTATCGCGGCGACTTTCGGCCTCTCGGGCACGGCAGCGGCGGAACCG                                                           | OPAG_04723                       |
| S2587          | ATGATTGTCACAGCAACGAAGCCGTCACATGGTTGGTTACGAGGCGTCGT<br>CCGGCTGATGGTTGCCGTGGTGATCCTGCCGCTGGCGTTTCGTCTCGTCGG<br>CGGCGGAACGGCCTCCGCCGACCCG                         | OPAG_02587                       |
| S4605          | ATGCACACGTCGTCGAACGAGAGTGGTTCATATGGGCAAGTCAGGAATCG<br>GTTTTTCCAGGAACAAGCACTGGTCTTCGCGCGTCGCTGTGCGACTGACC<br>GGGGCCGTCGTGTCCGGAACGCGCTGGTTCGGGGCCGCACAGGCCGCACC | OPAG_04605                       |

---

G

---

|       |                                                                                                                                                                    |            |
|-------|--------------------------------------------------------------------------------------------------------------------------------------------------------------------|------------|
| S9204 | ATGCCGCACCGTCGACCGAAGCCCTCGATCGTCCTCGGGGCTGTCGCCGC<br>TCTGGCTGTCGCAAGTCCCGTCGCGGTCTACGGCATCAGTAGCGCACCT<br>CC                                                      | OPAG_09204 |
| S7596 | ATGCGTACCTCGAGGGCGAGTCGGCGCTGCCGTCTCCGATCGAGACCACC<br>ACCGCCCCGCAGCGGTAGCTGT                                                                                       | OPAG_07596 |
| S2430 | ATGCACACGTCGTCGAACGAGAGTGGTCATATGGGCAAGTCAGGAATCG<br>GTTTTTCCAGGAACAAGCACTGGTCTTCGCGCGTCGCTGTCGCACTGACC<br>GGGGCCGTCGTGTCCGGAAGTGCCTGGTTCGGGGCCGCACAGGCCGCACC<br>G | OPAG_02430 |
| S0127 | ATGACCAGACTCCGCCGTGTCGCCTCCCTGGCGATGCCCGCCTTACTCGCT<br>TCTACCTGCACGTTTTTACGATGACGCCCCCTGTTGCGACGGCGGCCCG                                                           | OPAG_00127 |
| S4282 | ATGAGCGAGATCCGTAAGTCAGGCCTGCGCCGTGGGGCCCGCGTTGCCGG<br>CCTCGGTGCTGCCGCGGCCGTAGCCCTCGGCCTGATGTCCACCGGTGCTG<br>CGAATGCCGAC                                            | OPAG_04282 |
| S2584 | ATGAGCGGACGCCATCGCAAGCCCACCACCACCGGCCGCACCGTCGCCA<br>AGGTCGCCGTCACCGGCGCCATCATGGGCGTCGCCGGAGCAGCCTTCTCG<br>GGCACCGCGAACGCGGCACCC                                   | OPAG_02584 |
| S7732 | ATGCGCCCGCGAGGCAACTGCGAACAAACAAACATCAGAAAGGCCCCCA<br>TGCGAAGCTCCATCGCACGTCGTGCCGCCGTGTTCCGGCTCCGCCGCGCTG<br>CTGCTCCTCGGCCCGGTGCGCCGCTCCGCTCAGGCC                   | OPAG_07732 |

---

**Table S4.** The expression profile of proteins in lipid biosynthesis pathway

| ID           | Fold Change | pValue   | Protein Abundance* |          | Protein Name                                                           |
|--------------|-------------|----------|--------------------|----------|------------------------------------------------------------------------|
|              |             |          | G2                 | L2       |                                                                        |
| OPAG_00034T0 | 1.791822    | 0.664659 | 5.666667           | 2        | 3-oxoacyl-[acyl-carrier-protein] reductase                             |
| OPAG_00138T0 | 1.692276    | 0.975718 | 3                  | 1        | wax ester synthase/diacylglycerol acyltransferase                      |
| OPAG_00610T0 | 2.82046     | 0.293004 | 3                  | 1.666667 | phospholipid/glycerol acyltransferase                                  |
| OPAG_00905T0 | 1.84612     | 0.269861 | 14.66667           | 5.333333 | 3-oxoacyl-[acyl-carrier-protein] reductase                             |
| OPAG_01295T0 | 8.461381    | 0.021719 | 1                  | 1.666667 | 3-oxoacyl-[acyl-carrier-protein] reductase                             |
| OPAG_01425T0 | 8.461381    | 0.021719 | 1                  | 1.666667 | 2-hydroxycyclohexanecarboxyl-CoA dehydrogenase                         |
| OPAG_01519T0 | 1.269207    | 1.310584 | 4                  | 1        | acetyl-CoA carboxylase carboxyl transferase subunit                    |
| OPAG_02340T0 | -1.05052    | 0.576783 | 16                 | 3        | 3-oxoacyl-[acyl-carrier-protein] reductase                             |
| OPAG_02532T0 | 3.948645    | 0.167679 | 3                  | 2.333333 | acetyl-CoA carboxylase carboxyl transferase subunit                    |
| OPAG_02648T0 | -2.27277    | 0.039747 | 50                 | 4.333333 | 2-hydroxycyclohexanecarboxyl-CoA dehydrogenase                         |
| OPAG_02951T0 | 8.461381    | 0.021719 | 1                  | 1.666667 | 3-oxoacyl-[acyl-carrier-protein] reductase                             |
| OPAG_02967T0 | 8.461381    | 0.021719 | 1                  | 1.666667 | 2-hydroxycyclohexanecarboxyl-CoA dehydrogenase                         |
| OPAG_04461T0 | 3.046097    | 0.367192 | 1.666667           | 1        | 3-oxoacyl-[acyl-carrier-protein] reductase                             |
| OPAG_04782T0 | 3.807622    | 0.149043 | 4                  | 3        | acetyl-CoA carboxylase, biotin carboxylase                             |
| OPAG_05053T0 | 3.046097    | 0.367192 | 1.666667           | 1        | 2-hydroxycyclohexanecarboxyl-CoA dehydrogenase                         |
| OPAG_05054T0 | 3.046097    | 0.367192 | 1.666667           | 1        | cis-2,3-dihydrobiphenyl-2,3-diol dehydrogenase                         |
| OPAG_05807T0 | -1.64144    | 0.463281 | 8.333333           | 1        | propionyl-CoA carboxylase beta subunit                                 |
| OPAG_05810T0 | 4.351567    | 0.001439 | 11.66667           | 10       | malonyl CoA-acyl carrier protein transacylase                          |
| OPAG_05898T0 | 1.015366    | 1.646296 | 5                  | 1        | 1-acylglycerol-3-phosphate acyltransferase                             |
| OPAG_06418T0 | -1.77276    | 0.438206 | 9                  | 1        | 1-acylglycerol-3-phosphate acyltransferase                             |
| OPAG_06656T0 | 3.046097    | 0.367192 | 1.666667           | 1        | 3-oxoacyl-[acyl-carrier-protein] reductase                             |
| OPAG_06946T0 | 8.461381    | 0.021719 | 1                  | 1.666667 | acetyl-CoA carboxylase, biotin carboxylase                             |
| OPAG_07212T0 | 25.38414    | 0.000119 | 1                  | 5        | bifunctional wax ester synthase:acyl-CoAdiacylglycerol acyltransferase |

|              |          |          |          |          |                                               |
|--------------|----------|----------|----------|----------|-----------------------------------------------|
| OPAG_07242T0 | 3.046097 | 0.367192 | 1.666667 | 1        | 3-oxoacyl-[acyl-carrier-protein] synthase III |
| OPAG_07243T0 | 18.61504 | 0.000956 | 1        | 3.666667 | 3-oxoacyl-[acyl-carrier-protein] synthase III |
| OPAG_07257T0 | 18.61504 | 0.000956 | 1        | 3.666667 | diacylglycerol O-acyltransferase              |
| OPAG_08335T0 | 10.15366 | 0.015625 | 1        | 2        | 3-oxoacyl-[acyl-carrier-protein] reductase    |
| OPAG_09195T0 | -3.6854  | 1.00E-05 | 430.3333 | 23       | fatty acid synthase Fas I                     |
| OPAG_09292T0 | -4.92433 | 0.04924  | 25       | 1        | biotin carboxylase                            |

\* Protein expression abundance was calculated by PatternLab with ACfold analysis, the non-detected proteins were calculated as 1 to calculated the fold change <sup>[41]</sup>.

**Table S5.** The list of the strains and plasmids used in this study

| Strain or plasmid | Description                                                                                                                   | Source                          |
|-------------------|-------------------------------------------------------------------------------------------------------------------------------|---------------------------------|
| <b>Plasmid</b>    |                                                                                                                               |                                 |
| pTip-RT1          | Derived from pRE8424                                                                                                          | Tomohiro Tamura <sup>[2]</sup>  |
| pSET152           | Streptomyces ΦC31 integrase-based vector, apramycin resistance                                                                | Mary K. Hondalus <sup>[3]</sup> |
| pBSNC9031         | <i>E. coli-Rhodococcus</i> shuttle vector, <i>Rhodococcus</i> plasmid replication origin from pNC903, thiostrepton resistance | This study                      |
| pT2               | <i>E. coli-Rhodococcus</i> shuttle vector, <i>Rhodococcus</i> plasmid replication origin from pTip-RT1, apramycin resistance  | This study                      |
| pBSNC9031_La      | small laccase from <i>Streptomyces coelicolor</i> replaced its                                                                | This study                      |

|                                              |                                                                                                                                                                      |                                                       |
|----------------------------------------------|----------------------------------------------------------------------------------------------------------------------------------------------------------------------|-------------------------------------------------------|
|                                              | signal peptide with S2587 and TatAC with their native RBS were controlled by the promoter P203 in pBSNC9031                                                          |                                                       |
| pBSNC9031_La                                 | The FAS1 operon was controlled by the promoter Pben in pBSNC9031                                                                                                     | This study                                            |
| pT2_La                                       | small laccase from <i>Streptomyces coelicolor</i> replaced its signal peptide with S2587 and TatAC with their native RBS were controlled by the promoter P203 in pT2 | This study                                            |
| pK18mob                                      | Modified from pK18mobsacB by deleting the <i>sacB</i> cassette                                                                                                       | This study                                            |
| <hr/>                                        |                                                                                                                                                                      |                                                       |
| <b>Strain</b>                                |                                                                                                                                                                      |                                                       |
| <hr/>                                        |                                                                                                                                                                      |                                                       |
| <i>Rhodococcus opacus</i> PD630 (DSMZ 44193) | Wild type                                                                                                                                                            | German Collection of Microorganisms and Cell Cultures |
| PD630_La                                     | Transformed with vector pBSNC9031_La to overexpress the small laccase with S2587 and Tat transporter component TatA and TatC                                         | This study                                            |
| PD630_Fa                                     | Transformed with vector pBSNC9031_Fa to overexpress the FASI and PTT                                                                                                 | This study                                            |
| PD630_FL                                     | Transformed with vector pBSNC9031_Fa and pT2_La to overexpress the laccase module and FASI module                                                                    | This study                                            |
| <hr/>                                        |                                                                                                                                                                      |                                                       |



**Table S6. The expression abundance of proteins involved in aromatic compound catabolism.**

| Protein ID | Protein Abundance* |          |          |          |          |    |
|------------|--------------------|----------|----------|----------|----------|----|
|            | G1                 | G2       | G3       | L1       | L2       | L3 |
| OPAG_01303 | 0.00002            | 8.19E-05 | 8.19E-05 | 8.19E-05 | 0        | 0  |
| OPAG_00708 | 0.00002            | 6.27E-05 | 6.27E-05 | 6.27E-05 | 0        | 0  |
| OPAG_02067 | 0.00002            | 0.000105 | 0.000105 | 0.000105 | 0        | 0  |
| OPAG_01252 | 0.00002            | 0.000192 | 0.000192 | 0.000192 | 0        | 0  |
| OPAG_01630 | 0.00002            | 8.06E-05 | 8.06E-05 | 8.06E-05 | 0        | 0  |
| OPAG_01291 | 3.07E-05           | 3.11E-05 | 3.11E-05 | 3.11E-05 | 0        | 0  |
| OPAG_06605 | 3.27E-05           | 3.04E-05 | 3.04E-05 | 3.04E-05 | 0        | 0  |
| OPAG_02970 | 0                  | 0        | 0.00003  | 0.00003  | 0        | 0  |
| OPAG_02890 | 0                  | 0        | 0.00003  | 0.00003  | 0        | 0  |
| OPAG_00845 | 0                  | 0        | 3.58E-05 | 3.58E-05 | 0        | 0  |
| OPAG_07042 | 0                  | 0        | 4.16E-05 | 4.16E-05 | 0        | 0  |
| OPAG_09173 | 0.00002            | 6.16E-05 | 4.38E-05 | 4.38E-05 | 0        | 0  |
| OPAG_06577 | 0                  | 0        | 4.74E-05 | 4.74E-05 | 0        | 0  |
| OPAG_01958 | 0                  | 0        | 4.95E-05 | 4.95E-05 | 0        | 0  |
| OPAG_07826 | 0                  | 0        | 5.32E-05 | 5.32E-05 | 0        | 0  |
| OPAG_01717 | 0.00002            | 5.67E-05 | 5.53E-05 | 5.53E-05 | 0        | 0  |
| OPAG_01124 | 0                  | 0        | 6.11E-05 | 6.11E-05 | 0        | 0  |
| OPAG_04962 | 0.00002            | 6.75E-05 | 6.48E-05 | 6.48E-05 | 0        | 0  |
| OPAG_09075 | 0                  | 0        | 7.38E-05 | 7.38E-05 | 0        | 0  |
| OPAG_02879 | 0                  | 0        | 8.54E-05 | 8.54E-05 | 0        | 0  |
| OPAG_00652 | 0                  | 0        | 0.000159 | 0.000159 | 0        | 0  |
| OPAG_01196 | 0                  | 0        | 0.000327 | 0.000327 | 0        | 0  |
| OPAG_00854 | 0                  | 0        | 4.74E-05 | 6.59E-05 | 0        | 0  |
| OPAG_08008 | 0                  | 0        | 0        | 6.93E-05 | 0        | 0  |
| OPAG_06657 | 0                  | 0        | 0        | 7.84E-05 | 0        | 0  |
| OPAG_09152 | 0                  | 0        | 0        | 8.38E-05 | 0        | 0  |
| OPAG_01217 | 0                  | 0        | 0        | 0.000108 | 0        | 0  |
| OPAG_07376 | 0                  | 0        | 0        | 0.000109 | 0        | 0  |
| OPAG_05665 | 0                  | 0        | 0        | 0.000109 | 0        | 0  |
| OPAG_08218 | 0                  | 0        | 0        | 0.000119 | 0        | 0  |
| OPAG_07912 | 0                  | 0        | 0        | 0.000187 | 0        | 0  |
| OPAG_01379 | 0                  | 0        | 0        | 0.000538 | 0        | 0  |
| OPAG_06220 | 0                  | 0        | 0        | 0        | 0.000178 | 0  |
| OPAG_07938 | 0                  | 0        | 0        | 0        | 0.000238 | 0  |
| OPAG_01615 | 0                  | 0        | 0        | 0.000159 | 0.000238 | 0  |
| OPAG_02310 | 0                  | 0        | 0.00003  | 0.00003  | 0.000244 | 0  |

---

|            |          |          |          |          |          |          |
|------------|----------|----------|----------|----------|----------|----------|
| OPAG_09229 | 0        | 0        | 0        | 0        | 0.000335 | 0        |
| OPAG_02861 | 0        | 0        | 0.000104 | 0.000104 | 0.000405 | 0        |
| OPAG_01086 | 0.00002  | 0.000421 | 0.000421 | 0.000421 | 0.001039 | 0        |
| OPAG_01914 | 5.41E-05 | 1.86E-05 | 1.84E-05 | 4.09E-05 | 0.000111 | 7.61E-05 |
| OPAG_00336 | 5.41E-05 | 1.86E-05 | 1.84E-05 | 4.09E-05 | 0.000111 | 7.61E-05 |
| OPAG_05038 | 6.83E-05 | 3.04E-05 | 1.84E-05 | 4.09E-05 | 0.000111 | 7.61E-05 |
| OPAG_00353 | 0.000098 | 1.86E-05 | 1.84E-05 | 4.09E-05 | 0.000111 | 7.61E-05 |
| OPAG_09087 | 0.00022  | 1.86E-05 | 1.84E-05 | 4.09E-05 | 0.000111 | 7.61E-05 |
| OPAG_06339 | 6.69E-05 | 1.86E-05 | 0.00003  | 4.09E-05 | 0.000111 | 7.61E-05 |
| OPAG_07604 | 0.000173 | 8.21E-05 | 3.22E-05 | 4.09E-05 | 0.000111 | 7.61E-05 |
| OPAG_07477 | 4.98E-05 | 5.69E-05 | 4.16E-05 | 4.09E-05 | 0.000111 | 7.61E-05 |
| OPAG_04615 | 8.91E-05 | 5.02E-05 | 7.05E-05 | 4.09E-05 | 0.000111 | 7.61E-05 |
| OPAG_04734 | 0.000134 | 9.79E-05 | 0.00011  | 4.09E-05 | 0.000111 | 7.61E-05 |
| OPAG_03683 | 0.000132 | 0.000101 | 0.000134 | 6.59E-05 | 0.000111 | 7.61E-05 |
| OPAG_05292 | 0.001249 | 0.000103 | 0.000124 | 9.09E-05 | 0.000111 | 7.61E-05 |
| OPAG_03181 | 0.000976 | 0.000266 | 0.000175 | 0.000112 | 0.000111 | 7.61E-05 |
| OPAG_02510 | 6.48E-05 | 0.000118 | 0.000173 | 0.000119 | 0.000111 | 7.61E-05 |
| OPAG_02203 | 4.98E-05 | 3.04E-05 | 4.74E-05 | 0.000123 | 0.000111 | 7.61E-05 |
| OPAG_03187 | 0.001316 | 5.67E-05 | 0.000112 | 0.000157 | 0.000111 | 7.61E-05 |
| OPAG_03513 | 0.00047  | 5.56E-05 | 0.000111 | 0.000173 | 0.000111 | 7.61E-05 |
| OPAG_04897 | 0.0001   | 0.000038 | 3.58E-05 | 6.59E-05 | 0.000172 | 7.61E-05 |
| OPAG_05770 | 5.79E-05 | 4.33E-05 | 0.00003  | 4.09E-05 | 0.000178 | 7.61E-05 |
| OPAG_04338 | 0.000218 | 0.000105 | 8.64E-05 | 9.09E-05 | 0.000178 | 7.61E-05 |
| OPAG_03454 | 0.000569 | 0.000205 | 0.000249 | 0.000341 | 0.000254 | 7.61E-05 |
| OPAG_04368 | 7.64E-05 | 1.86E-05 | 4.16E-05 | 6.95E-05 | 0.000111 | 0.000113 |
| OPAG_02996 | 0.000349 | 7.96E-05 | 8.64E-05 | 0.000162 | 0.000202 | 0.000113 |
| OPAG_06603 | 0        | 0        | 0        | 0        | 0        | 0.000114 |
| OPAG_06600 | 0        | 0        | 0.00003  | 6.95E-05 | 0        | 0.000114 |
| OPAG_00941 | 3.07E-05 | 0.000038 | 7.37E-05 | 7.84E-05 | 0        | 0.000114 |
| OPAG_06526 | 0        | 0        | 0.00003  | 0.000233 | 0        | 0.000114 |
| OPAG_00829 | 0.000275 | 3.11E-05 | 0.00003  | 4.09E-05 | 0.000111 | 0.000114 |
| OPAG_03248 | 0.000215 | 4.98E-05 | 0.000135 | 6.59E-05 | 0.000111 | 0.000114 |
| OPAG_02207 | 5.95E-05 | 1.86E-05 | 0.00003  | 6.95E-05 | 0.000111 | 0.000114 |
| OPAG_01741 | 0        | 0        | 0        | 6.59E-05 | 0.000178 | 0.000114 |
| OPAG_05666 | 0        | 0        | 3.22E-05 | 6.59E-05 | 0.000272 | 0.000114 |
| OPAG_03015 | 0        | 0        | 0        | 7.84E-05 | 0        | 0.000132 |
| OPAG_05982 | 0.000693 | 0.000117 | 0.000219 | 0.000103 | 0.000111 | 0.000132 |
| OPAG_05631 | 0.0002   | 6.05E-05 | 0.000143 | 0.000132 | 0.000111 | 0.000132 |
| OPAG_07408 | 0        | 0        | 0        | 0        | 0        | 0.00017  |
| OPAG_03041 | 9.36E-05 | 1.86E-05 | 1.84E-05 | 0.000132 | 0.000111 | 0.00017  |
| OPAG_03045 | 0.000156 | 3.11E-05 | 0.00003  | 0.000202 | 0.000178 | 0.000188 |

---

---

|            |          |          |          |          |          |          |
|------------|----------|----------|----------|----------|----------|----------|
| OPAG_05074 | 0        | 0        | 0        | 0        | 0        | 0.000188 |
| OPAG_00864 | 0.000118 | 0.000074 | 0.000144 | 7.84E-05 | 0.000111 | 0.000189 |
| OPAG_03859 | 0        | 0        | 0        | 6.59E-05 | 0        | 0.000191 |
| OPAG_03970 | 8.55E-05 | 3.11E-05 | 3.58E-05 | 0.000294 | 0.000868 | 0.000207 |
| OPAG_06955 | 0        | 0        | 0        | 0        | 0        | 0.000228 |
| OPAG_01375 | 0        | 0        | 3.22E-05 | 0.000781 | 0        | 0.000244 |
| OPAG_06340 | 0.000366 | 0.00013  | 0.000136 | 0.000127 | 0.000111 | 0.000244 |
| OPAG_01373 | 0        | 0        | 0        | 0.000596 | 0        | 0.000244 |
| OPAG_00869 | 8.93E-05 | 3.11E-05 | 0.000039 | 0.000697 | 0.000349 | 0.000244 |
| OPAG_01377 | 0.00002  | 0.00016  | 0.000161 | 0.000329 | 0        | 0.000263 |
| OPAG_00936 | 0        | 0        | 0        | 0        | 0.000457 | 0.000263 |
| OPAG_00546 | 0.000236 | 7.46E-05 | 4.16E-05 | 0.000296 | 0.000111 | 0.000263 |
| OPAG_02568 | 6.38E-05 | 4.35E-05 | 5.64E-05 | 9.09E-05 | 0.000244 | 0.000267 |
| OPAG_04898 | 0.000847 | 0.000282 | 0.000368 | 0.00031  | 0.000302 | 0.000281 |
| OPAG_00073 | 8.55E-05 | 3.11E-05 | 6.11E-05 | 0.000577 | 0.000868 | 0.0003   |
| OPAG_07868 | 0        | 0        | 4.38E-05 | 7.84E-05 | 0        | 0.000301 |
| OPAG_06266 | 0.000236 | 4.21E-05 | 4.95E-05 | 0.000347 | 0.000111 | 0.000337 |
| OPAG_03279 | 0.000256 | 5.69E-05 | 5.53E-05 | 0.000285 | 0.001646 | 0.00034  |
| OPAG_00426 | 0        | 0        | 3.58E-05 | 3.58E-05 | 0        | 0.000347 |
| OPAG_00937 | 0        | 0        | 0        | 0.000634 | 0        | 0.000356 |
| OPAG_07311 | 0.000337 | 0.000202 | 0.000281 | 0.00044  | 0.000332 | 0.000357 |
| OPAG_06519 | 0.000265 | 6.81E-05 | 0.000068 | 0.000319 | 0.000202 | 0.000375 |
| OPAG_00945 | 3.27E-05 | 3.62E-05 | 0.00003  | 0.000244 | 0.00041  | 0.000413 |
| OPAG_09141 | 0.000574 | 0.000161 | 0.000121 | 0.000477 | 0.000444 | 0.000415 |
| OPAG_00710 | 0.000343 | 1.86E-05 | 1.84E-05 | 0.000615 | 0.000111 | 0.00045  |
| OPAG_08214 | 0.000251 | 1.86E-05 | 3.58E-05 | 0.000655 | 0.000178 | 0.000467 |
| OPAG_03805 | 0.00042  | 6.74E-05 | 0.000153 | 0.000448 | 0.000206 | 0.000474 |
| OPAG_01352 | 0        | 0        | 0        | 0.000208 | 0        | 0.000497 |
| OPAG_09096 | 0.000321 | 3.15E-05 | 5.32E-05 | 0.000746 | 0.000206 | 0.000542 |
| OPAG_06121 | 0        | 0        | 0        | 0.000335 | 0        | 0.000546 |
| OPAG_00675 | 0.000531 | 0.000123 | 0.000276 | 0.000612 | 0.000172 | 0.0006   |
| OPAG_00871 | 0        | 0        | 0        | 0.000407 | 0.000263 | 0.000694 |
| OPAG_01085 | 9.45E-05 | 9.16E-05 | 9.32E-05 | 0.000566 | 0.000172 | 0.000696 |
| OPAG_07840 | 0.001156 | 0.000185 | 0.00029  | 0.000657 | 0.00071  | 0.00099  |
| OPAG_01372 | 0.00002  | 0.000578 | 5.32E-05 | 0.001026 | 0.000475 | 0.001048 |
| OPAG_07409 | 4.54E-05 | 0.000038 | 5.64E-05 | 0.001037 | 0        | 0.001048 |
| OPAG_04511 | 7.99E-05 | 0.000236 | 0.000276 | 0.00103  | 0.000273 | 0.001141 |
| OPAG_04895 | 0.003954 | 0.000346 | 0.00052  | 0.000902 | 0.000293 | 0.001182 |
| OPAG_04896 | 0.001202 | 0.00027  | 0.000284 | 0.00076  | 0.000302 | 0.001216 |
| OPAG_01378 | 5.25E-05 | 0.000234 | 0.000177 | 0.001188 | 0.001522 | 0.001331 |
| OPAG_09046 | 0.00002  | 4.98E-05 | 4.98E-05 | 0.000851 | 0.000387 | 0.001578 |

---

|            |          |          |          |          |          |          |
|------------|----------|----------|----------|----------|----------|----------|
| OPAG_02267 | 0.006458 | 0.000666 | 0.001087 | 0.002041 | 0.000429 | 0.001837 |
| OPAG_01382 | 0.000211 | 3.15E-05 | 4.16E-05 | 0.004318 | 0.004984 | 0.004431 |
| OPAG_04741 | 7.86E-05 | 0.000106 | 7.06E-05 | 0.008162 | 0.003063 | 0.015208 |

\* Protein expression abundance was calculated by PatternLab and the number showed in the table was normalized according to their percentage among total proteins detected.

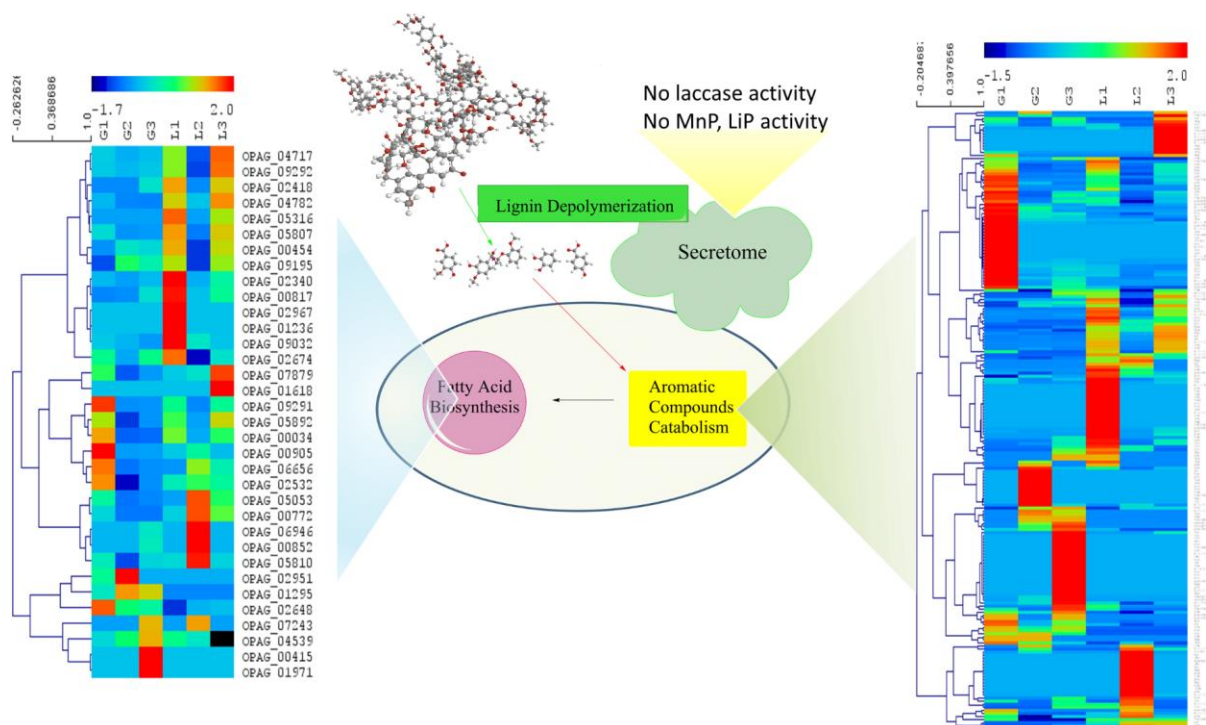

**Figure S1.** The overview of proteomics analysis of *R. opacus* PD630 grown on 1% glucose or lignin as carbon source. The capacity of lignin depolymerization, aromatic compound catabolism, and lipid biosynthesis were analyzed by proteomics and guided the biodesign of *R. opacus* PD630 for efficient lignin bioconversion into lipid.

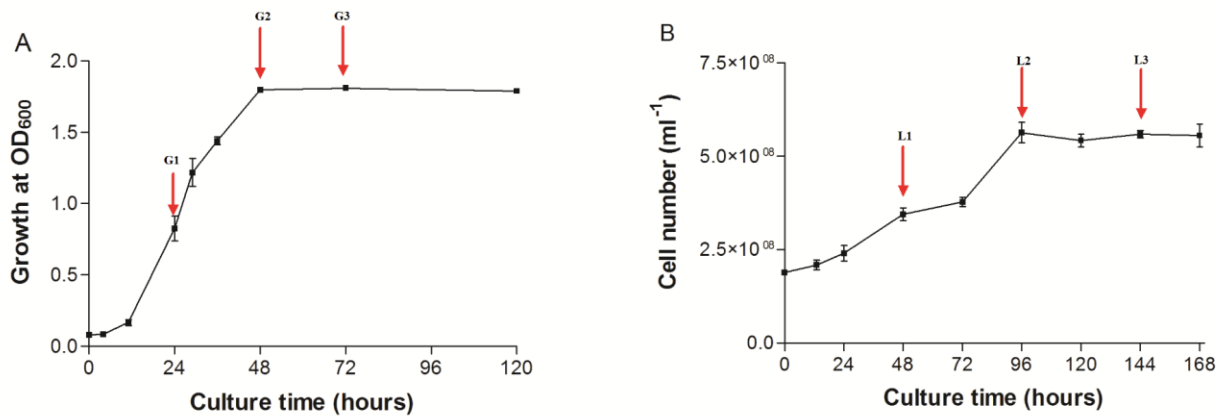

**Figure S2.** The growth curve of *R. opacus* PD630 grown on 1% glucose or lignin as carbon source. The red arrow indicated the sample collection timing for proteomics analysis. The alkali lignin used in this study was purchased from sigma (Sigma-Aldrich #370959).

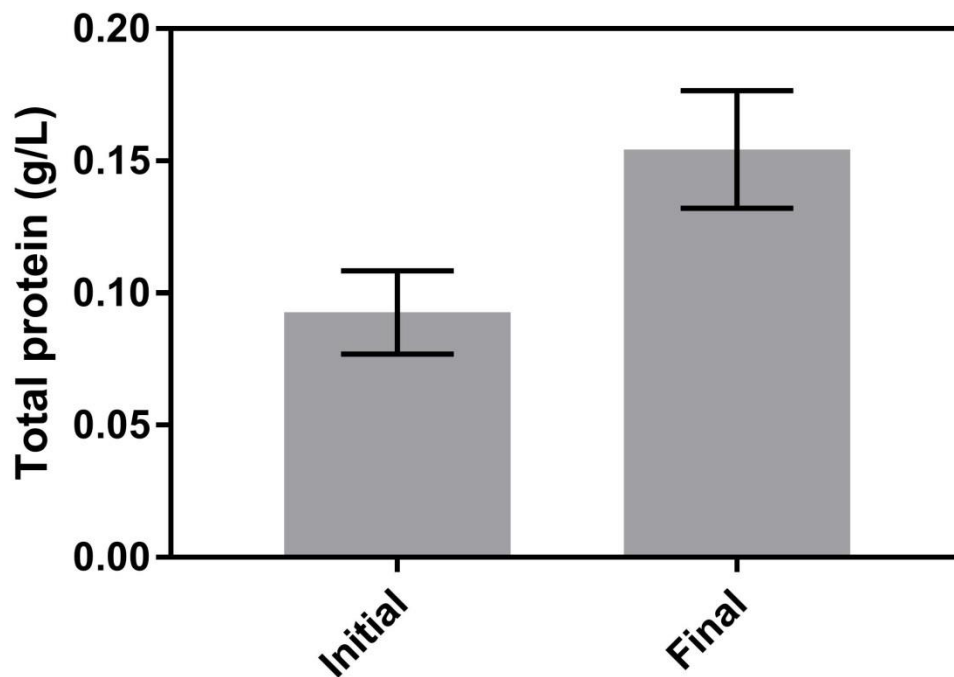

**Figure S3.** The total protein of bacteria *R. opacus* PD630 grown in 1% of lignin as carbon source. “Initial” represented the total protein extracted from the bacteria at the time inoculating to the lignin medium; “Final” represented the total protein extracted from the bacteria grown in 1% lignin medium for 96 hours, which is the sample indicated as “L2” in Figure S2. The significant total protein increase was observed, which indicated that the increase of the CFU is caused by actual bacterial growth on lignin instead of just bacterial reductive division.

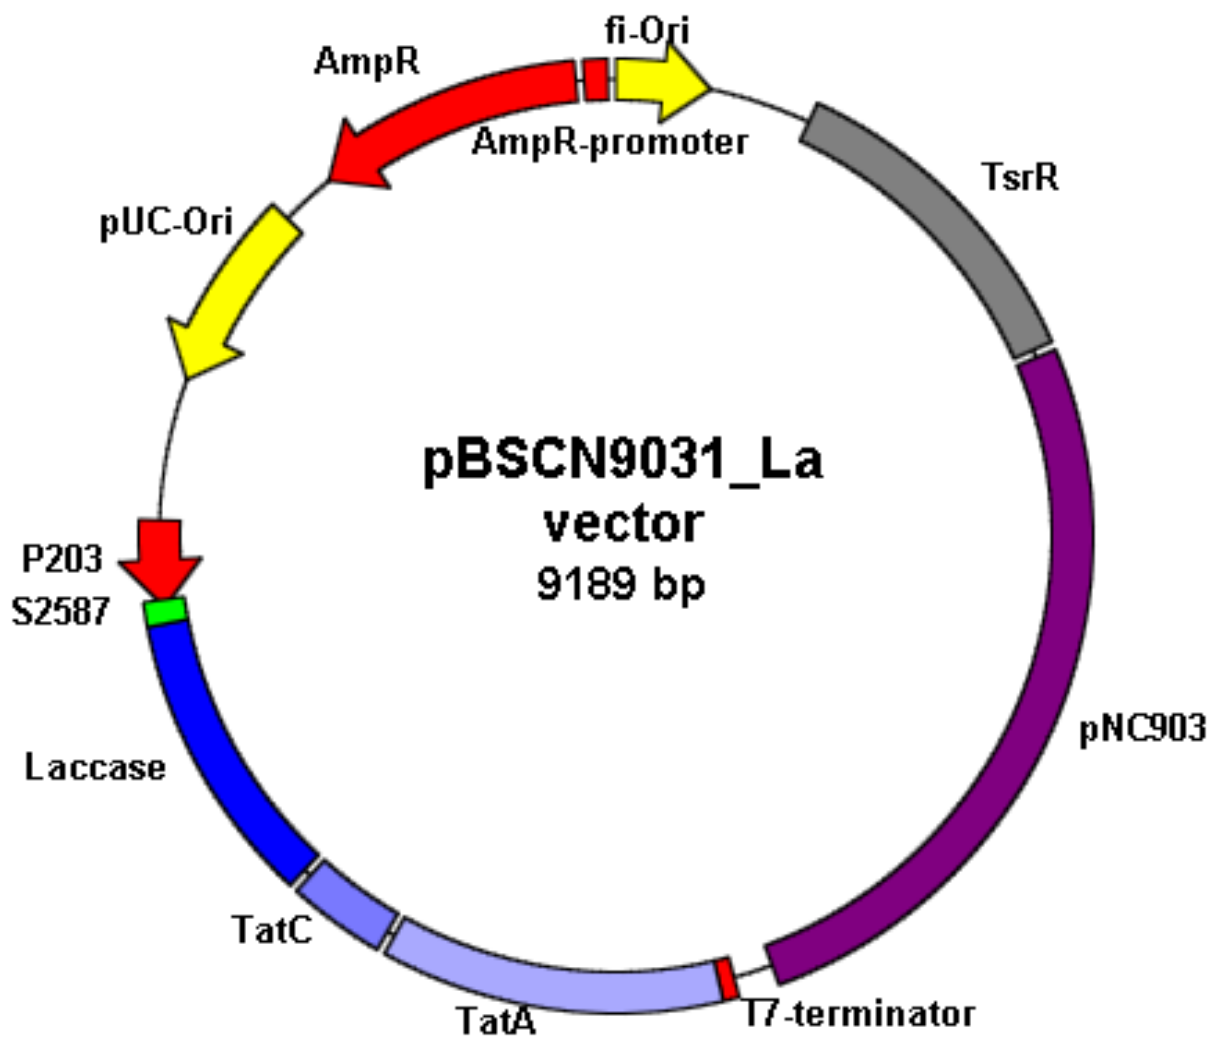

**Figure S4.** The map of vector pBSNC9031\_La used for laccase secretory production in *R. opacus* PD630

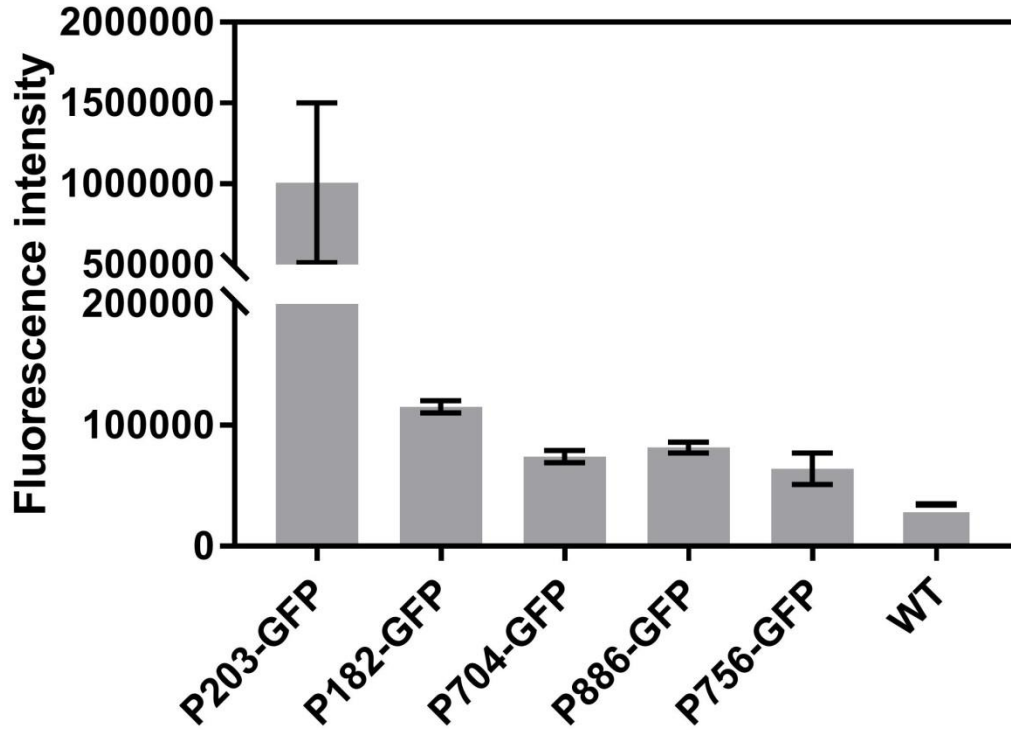

**Figure S5.** The fluorescence intensity of GFP in the engineered strain with different promoters/RBSs. The strain engineered with report gene GFP controlled by different promoters/RBSs were grown in 0.5% of glucose medium to measure the promoters/RBSs strength.



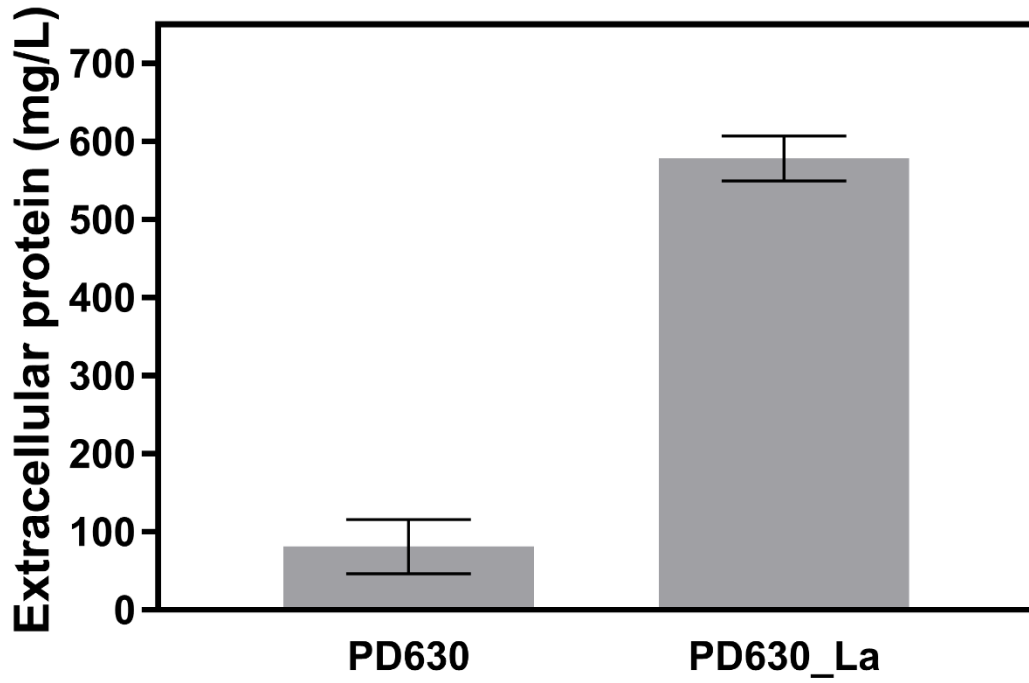

**Figure S6.** The comparison of yield for total secretory proteins among the engineered strain PD630\_La and control strain PD630 on 1% glucose medium on the fourth day.

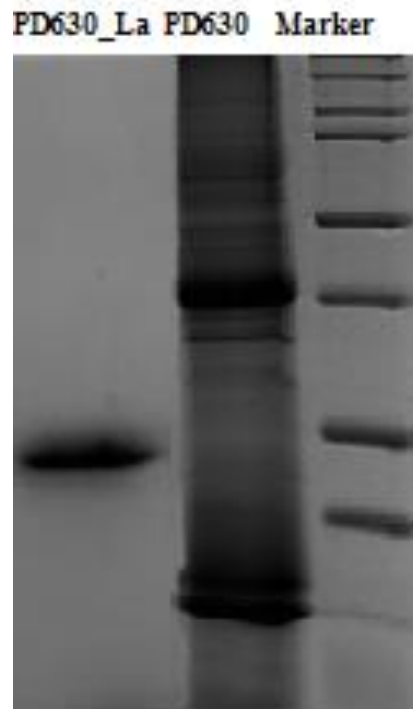

**Figure S7.** The comparison of total secreted proteins between the engineered strain PD630\_La and wild type PD630 on SDS-PAGE. The proteins from the supernatant were collected by TCA method as described in the Methods section, and 50  $\mu$ g of the concentrated proteins were loaded to the gel.

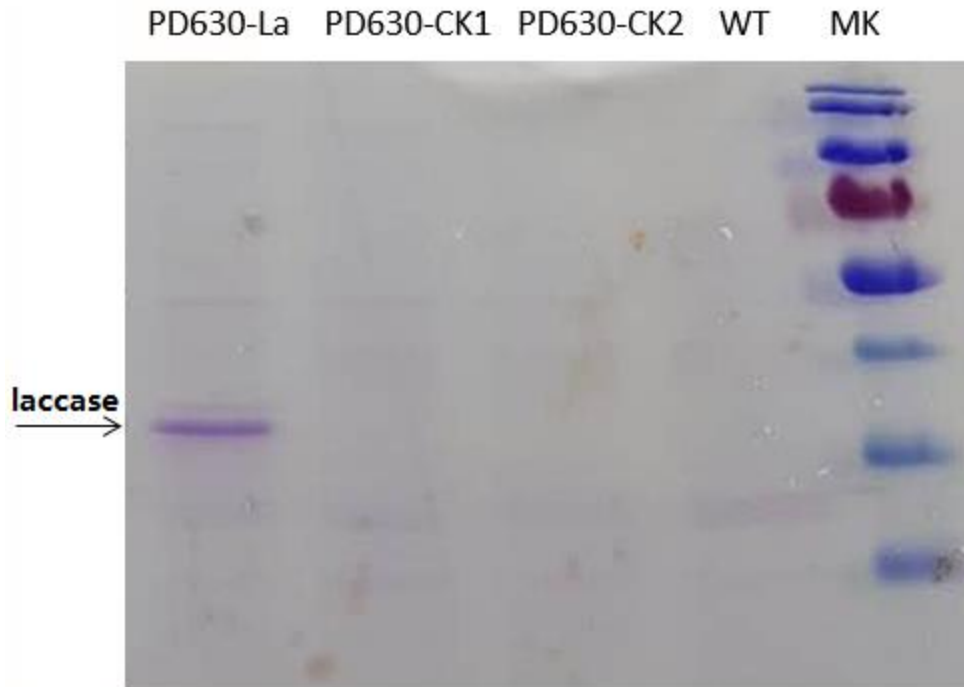

**Figure S8.** The comparison of total secreted proteins in the culture supernatant between the engineered strain PD630\_La and control strains on SDS-PAGE. The strains grown on 2% of glucose for 7 days, and the supernatant was collected by centrifuging to remove the cells. 50  $\mu$ L of culture supernatant without protein concentration were used to load on the SDS-PAGE. PD630\_CK1 was the control strain engineered with the same promoter/RBS and signal peptide with PD630\_La, but the laccase was replaced by a protein lunasin which could not be secreted with the S2587 signal peptide; PD630\_CK2 was the control strain engineered with the same plasmid but without laccase gene; the WT is the wild type strain of PD630.

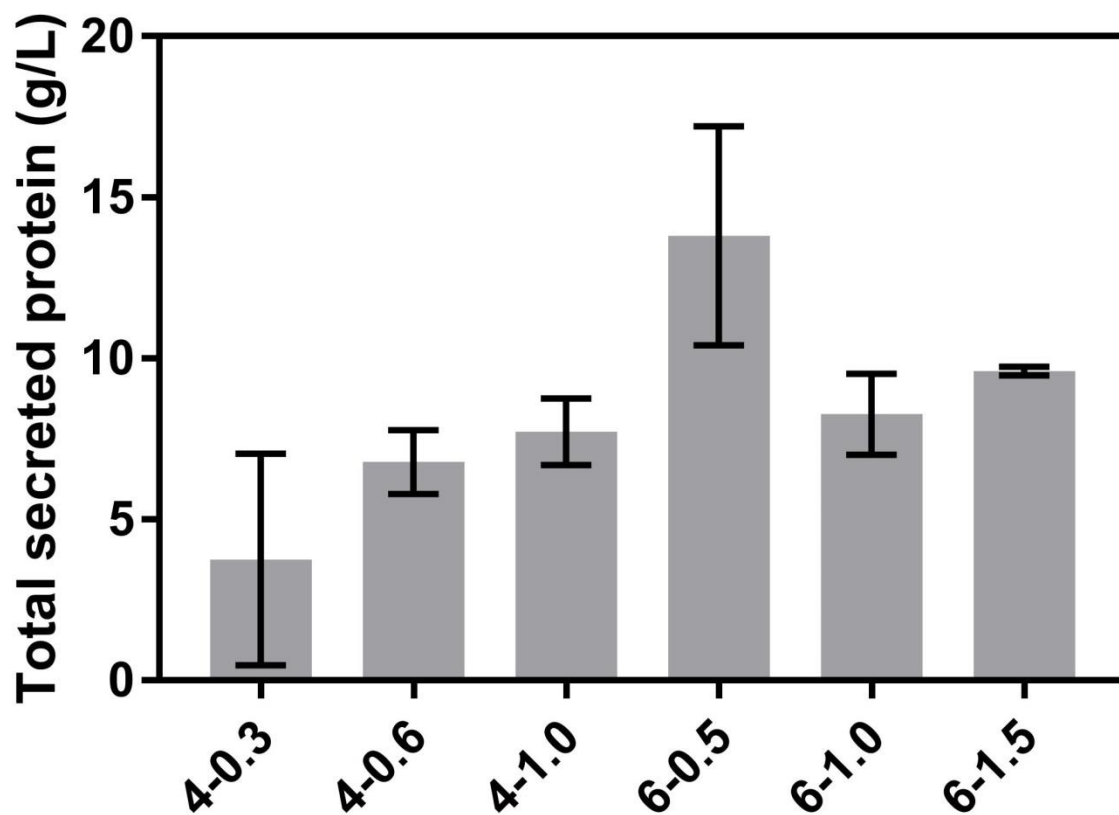

**Figure S9.** The yield of secretory protein by the engineered strain PD630\_La after 7-days of growth on media with different carbon and nitrogen concentrations. The numbers of “X-Y” in the x-axis indicated that X% and Y% (w/v) of glucose and  $\text{NH}_4\text{NO}_3$  were used as carbon and nitrogen source, respectively.

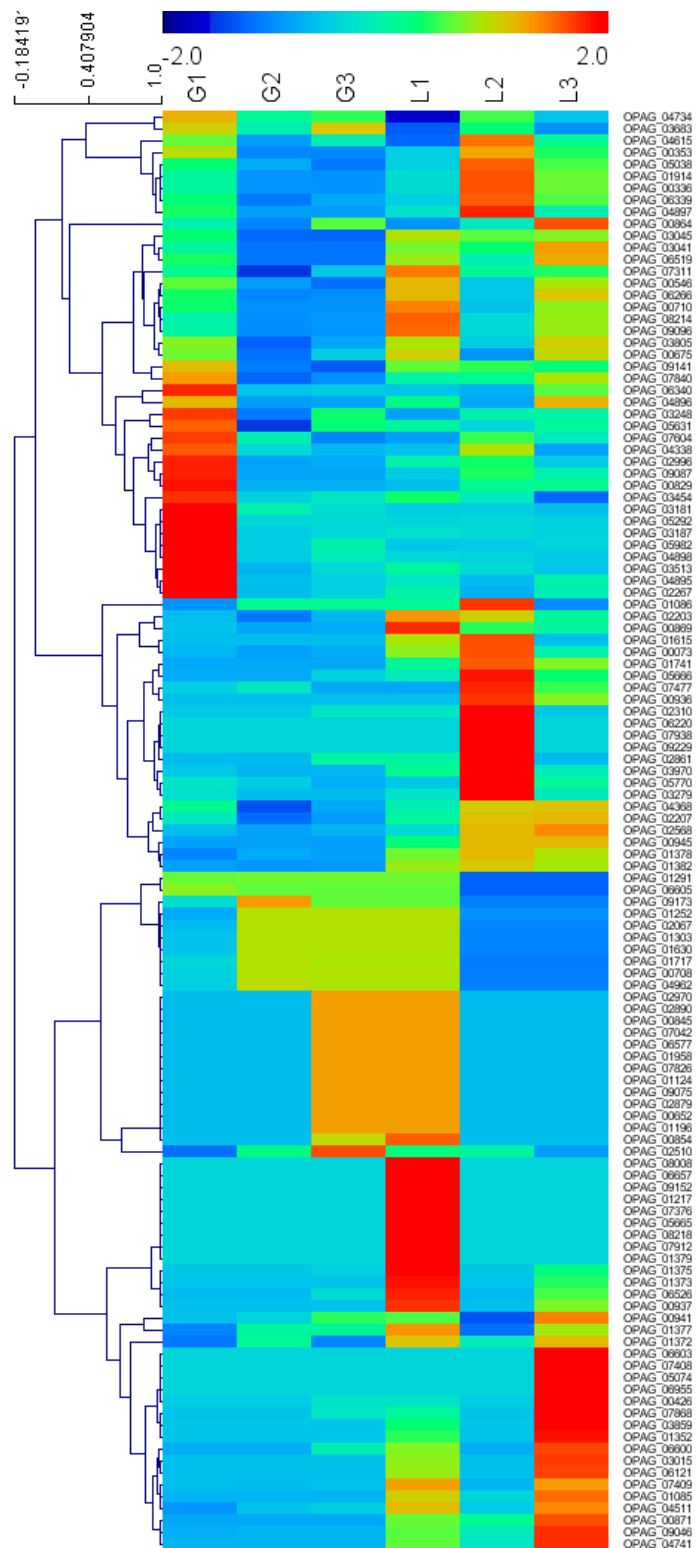

**Figure S10.** Hierarchical cluster of differentially expressed proteins involved in aromatic compound catabolism.

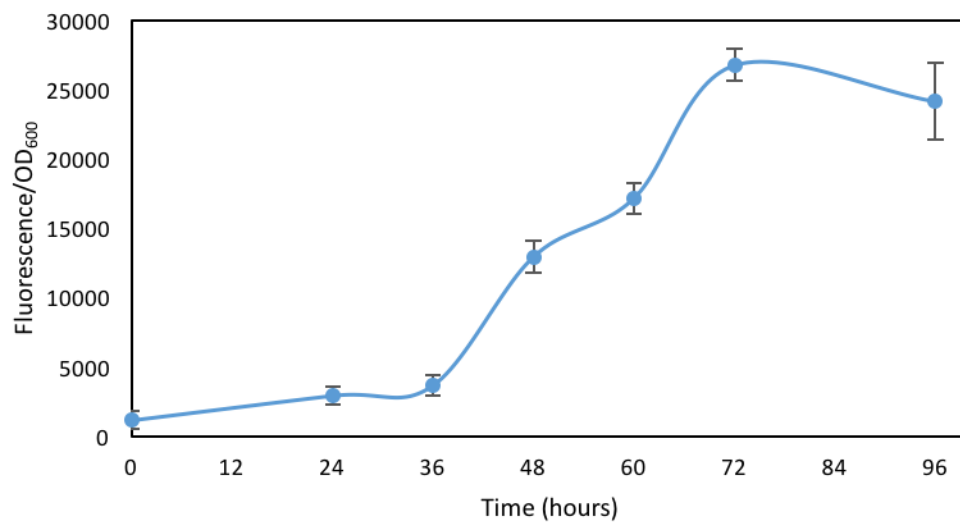

**Figure S11.** The lipid accumulation of *R. opacus* PD630 grown on 1% glucose. The lipid yield was indicated by Nile Red fluorescence.

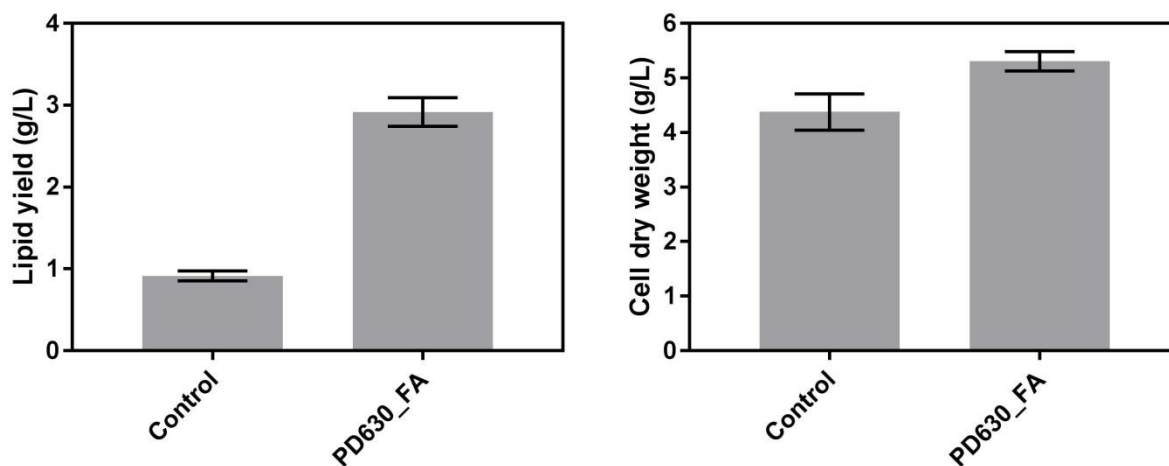

**Figure S12.** The comparison of lipid yield (left) and cell biomass yield (right) between the engineered strain PD630\_Fa and control strain. The control strain was constructed by transformed with the same plasmid without *fasI* gene operon. 1  $\mu\text{g/mL}$  thiostrepton was added at the beginning of fermentation and 2 mM sodium benzoate was added at the third day to induce the overexpression of *fasI* gene operon. The strains were harvested for biomass measuring and lipid extraction after growing on 2% glucose as carbon source with 1.4 g/L  $\text{NH}_4\text{NO}_3$  as nitrogen source for 4 days.

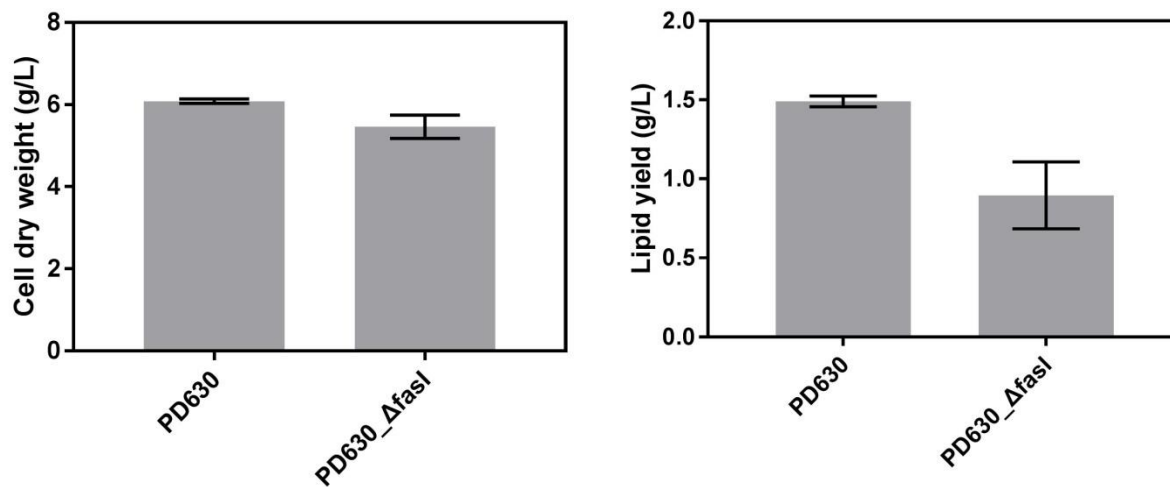

**Figure S13.** The comparison of cell biomass yield (left) and lipid yield (right) between the *fasI* mutant strain PD630\_Δ*fasI* and wild type PD630. The strains were harvested for biomass measuring and lipid extraction after growing on 2% glucose as carbon source with 1.4 g/L  $\text{NH}_4\text{NO}_3$  as nitrogen source for 4 days.



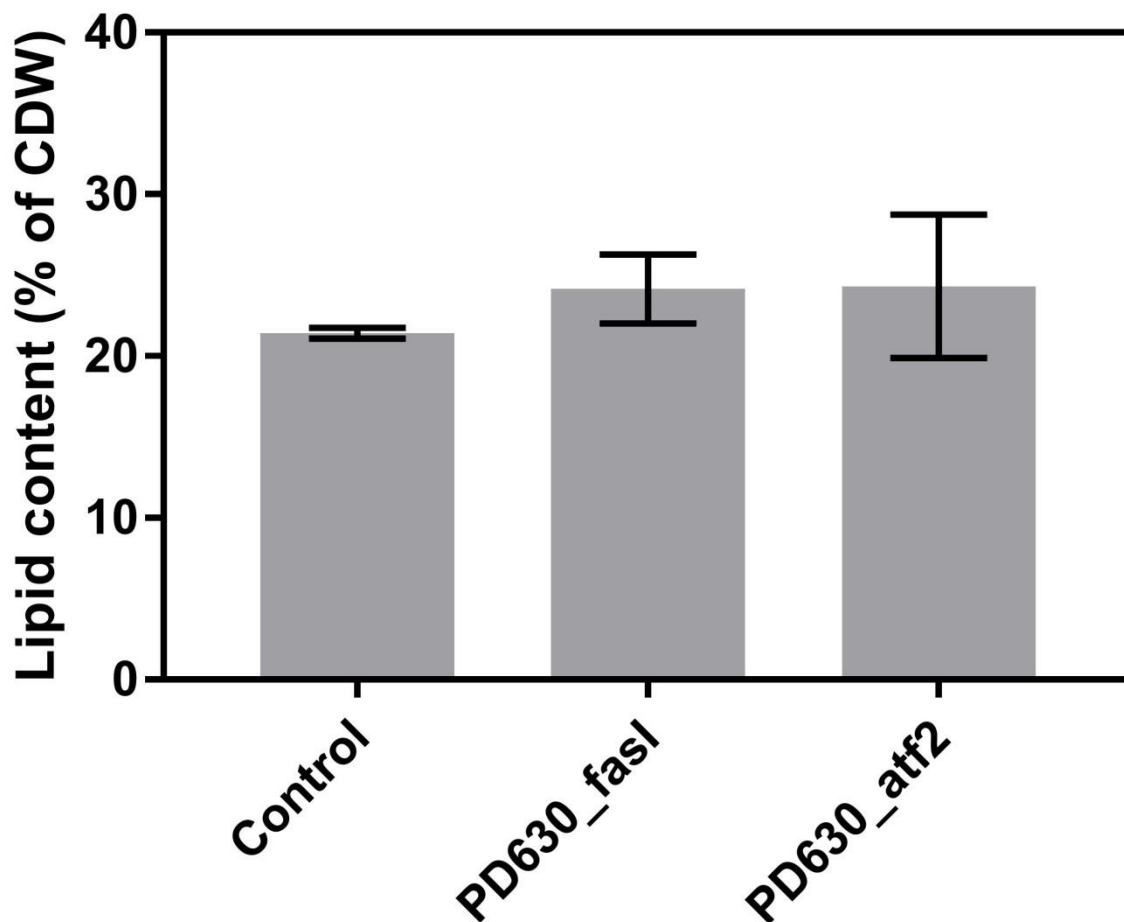

**Figure S14.** The lipid content of the strain with overexpression of *fasI* and *atf2*, respectively. PD630\_fasI is the strain overexpression with *fasI* operon only; PD630\_atf2 is the strain overexpressed with gene *atf2*. The control strain was constructed by transformed with the same plasmid without *fasI* gene operon and *atf2* gene. 1  $\mu\text{g}/\text{mL}$  thiostrepton was added at the beginning of fermentation and 2 mM sodium benzoate was added at the third day to induce the overexpression of *fasI* gene operon. The strains were harvested for biomass measuring and lipid extraction after growing on 2% glucose as carbon source with 1.4 g/L  $\text{NH}_4\text{NO}_3$  as nitrogen source for 4 days.

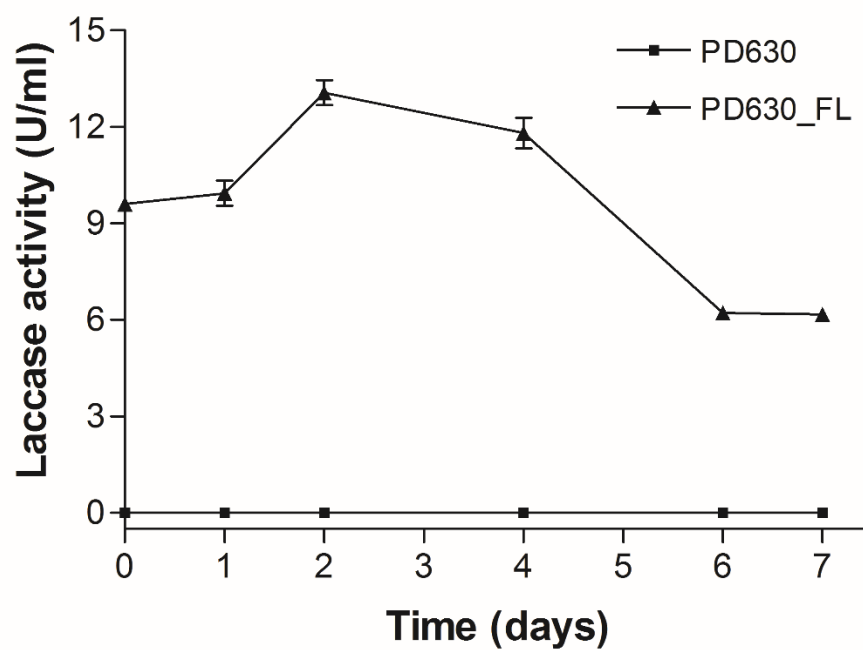

**Figure S15.** The laccase activity of co-transformed strain PD630\_FL during fermentation on insoluble alkali lignin. 5 mL of pre-cultured strain from 2% glucose were inoculated to 50 mL of aforementioned minimum medium with 1% of alkali lignin as carbon source.

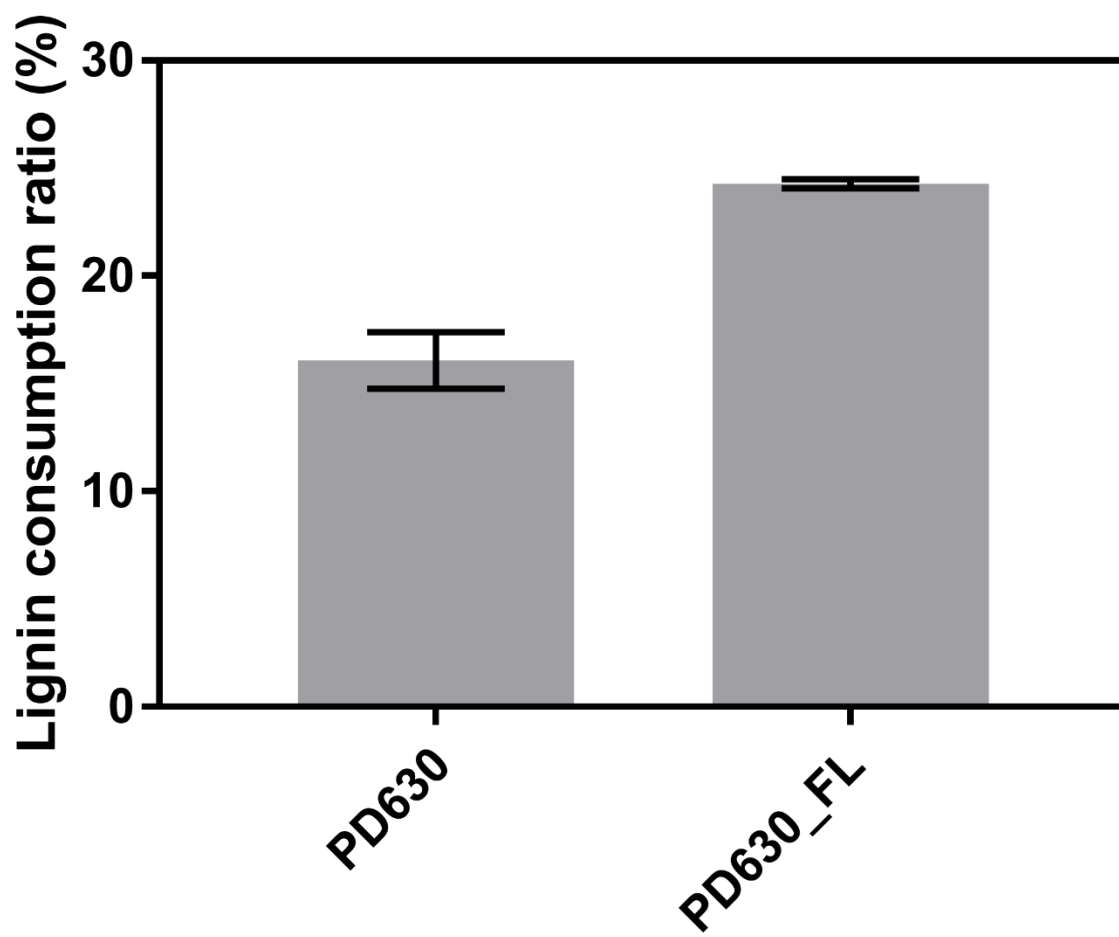

**Figure S16.** The lignin consumption ratio between the engineered strain PD630\_FL and control strain. The lignin concentration was measured by Prussian Blue assay.

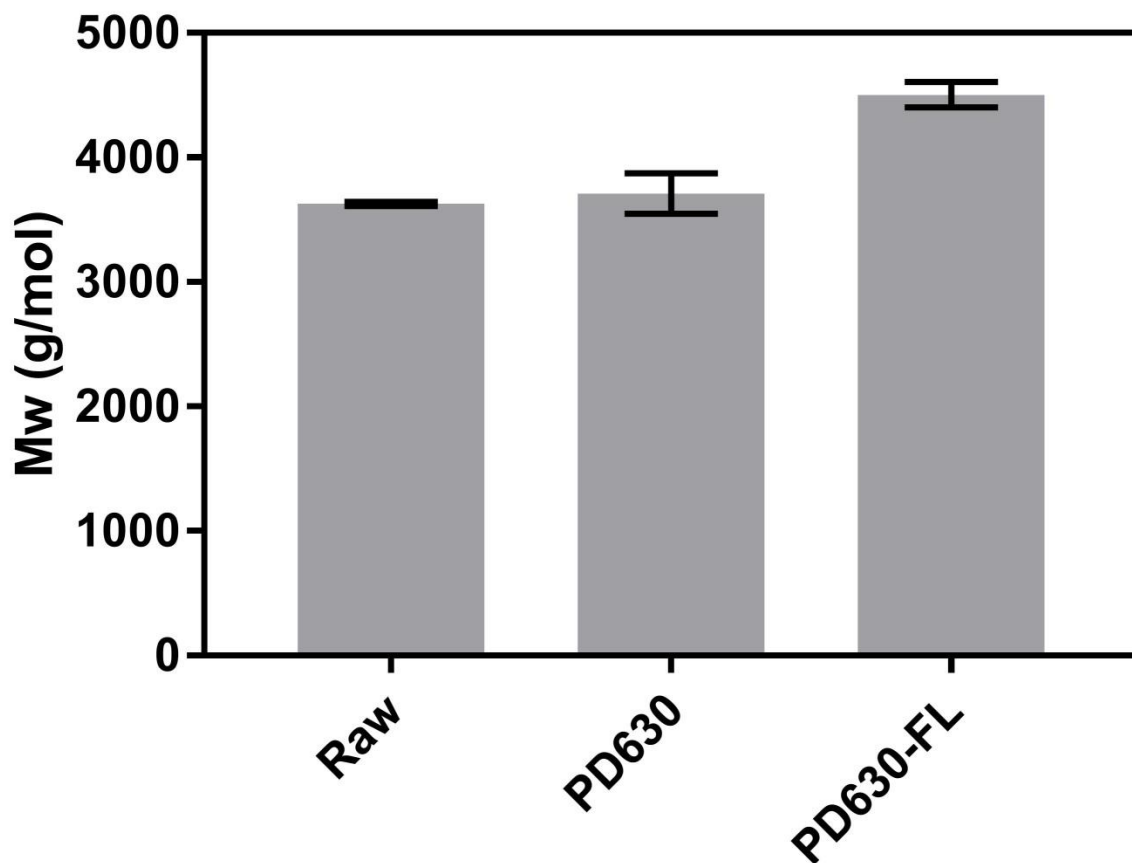

**Figure S17.** The molecular weight analysis of the lignin by GPC. The figure shows the Mw of the different treated lignin. Raw: raw lignin without bacterial conversion; PD630: the lignin fermented by control strain *R. opacus* PD630; PD630-FL: lignin fermented by engineered strain PD630\_FL with laccase mediator acetosyringone.

## Reference

- [1] T. Matsui, H. Saeki, N. Shinzato, H. Matsuda, *Curr. Microbiol.* **2006**, *52*, 445.
- [2] N. Nakashima, T. Tamura, *Appl. Environ. Microbiol.* **2004**, *70*, 5557.
- [3] Y. Hong, M. K. Hondalus, *FEMS Microbiol. Lett.* **2008**, *287*, 63.
- [4] R. Kalscheuer, M. Arenskötter, A. Steinbüchel, *Appl. Microbiol. Biotechnol.* **1999**, *52*, 508; K.-s. Na, K. Nagayasu, A. Kuroda, N. Takiguchi, T. Ikeda, H. Ohtake, J. Kato, *J. Biosci. Bioeng.* **2005**, *99*, 408.
- [5] K. Chourey, J. Jansson, N. VerBerkmoes, M. Shah, K. L. Chavarria, L. M. Tom, E. L. Brodie, R. L. Hettich, *J. Proteome Res.* **2010**, *9*, 6615.
- [6] Y. Zhang, P. Gao, Z. Xing, S. Jin, Z. Chen, L. Liu, N. Constantino, X. Wang, W. Shi, J. S. Yuan, S. Y. Dai, *Mol. Cell. Proteomics* **2013**, *12*, 3431.
- [7] Y. Zhang, S. Liu, S. Dai, J. Yuan, *BMC Bioinformatics* **2012**, *13*, S8.
- [8] M. P. Washburn, D. Wolters, J. R. Yates, 3rd, *Nat. Biotechnol.* **2001**, *19*, 242.
- [9] J. W. Holder, J. C. Ulrich, A. C. DeBono, P. A. Godfrey, C. A. Desjardins, J. Zucker, Q. Zeng, A. L. B. Leach, I. Ghiviriga, C. Dancel, T. Abeel, D. Gevers, C. D. Kodira, B. Desany, J. P. Affourtit, B. W. Birren, A. J. Sinskey, *PLoS Genet.* **2011**, *7*, e1002219.
- [10] T. Xu, S. K. Park, J. D. Venable, J. A. Wohlschlegel, J. K. Diedrich, D. Cociorva, B. Lu, L. Liao, J. Hewel, X. Han, C. C. L. Wong, B. Fonslow, C. Delahunty, Y. Gao, H. Shah, J. R. Yates III, *J. Proteomics* **2015**, *129*, 16
- [11] T. Xu, J. Venable, S. K. Park, D. Cociorva, B. Lu, L. Liao, J. Wohlschlegel, J. Hewel, J. Yates III, "ProLuCID, a fast and sensitive tandem mass spectra-based protein identification program", presented at *Molecular & Cellular Proteomics*, **2006**.
- [12] C. Zhao, S. Xie, Y. Pu, R. Zhang, F. Huang, A. J. Ragauskas, J. S. Yuan, *Green Chem.* **2016**, *18*, 1306.
- [13] Y. Pu, S. Cao, A. J. Ragauskas, *Energy Environ. Sci.* **2011**, *4*, 3154.
- [14] S. Xie, Q. Sun, Y. Pu, F. Lin, S. Sun, X. Wang, A. J. Ragauskas, J. S. Yuan, *ACS Sustain. Chem. Eng.* **2017**, *5*, 2215.
- [15] F. Berini, M. Verce, L. Ausec, E. Rosini, F. Tonin, L. Pollegioni, I. Mandić-Mulec, *Appl. Microbiol. Biotechnol.* **2018**, *102*, 2425.
- [16] S. Ma, N. Liu, H. Jia, D. Dai, J. Zang, Z. Cao, J. Dong, *J. Basic Microbiol.* **2018**, *58*, 68.
- [17] X. Ma, L. Liu, Q. Li, Y. Liu, L. Yi, L. Ma, C. Zhai, *Enzym. Microb. Technol.* **2017**, *103*, 34.
- [18] S. Ece, C. Lambertz, R. Fischer, U. Commandeur, *AMB Express* **2017**, *7*, 86.
- [19] A. Safary, R. Moniri, M. Hamzeh-Mivehroud, S. Dastmalchi, *J. Biotechnol.* **2016**, *227*, 56.
- [20] B. Wang, Y. Yan, Y. Tian, W. Zhao, Z. Li, J. Gao, R. Peng, Q. Yao, *World J. Microb. Biot.* **2016**, *32*, 40.
- [21] S. Kumar, K. K. Jain, K. N. Bhardwaj, S. Chakraborty, R. C. Kuhad, *PloS One* **2015**, *10*, e0144379.
- [22] B. Z. Feng, P. Li, *Braz. J. Microbiol.* **2014**, *45*, 351.
- [23] C. Ottoni, M. Simões, S. Fernandes, C. Santos, N. Lima, *Int. J. Env. Res. Pub. He.* **2016**, *13*, 778.
- [24] M. Vrsanska, S. Voberkova, V. Langer, D. Palovcikova, A. Moulick, V. Adam, P. Kopel, *Molecules* **2016**, *21*, 1553.
- [25] F. He, X. Qin, H. Zhang, Y. Yang, X. Zhang, Y. Yang, *J. Chem. Technol. Biot.* **2015**, *90*, 2265.

- [26] F. Zheng, Q. An, G. Meng, X.-J. Wu, Y.-C. Dai, J. Si, B.-K. Cui, *Int. J. Biol. Macromol.* **2017**, *102*, 758.
- [27] B. Bertrand, F. Martínez-Morales, R. Tinoco-Valencia, S. Rojas, L. Acosta-Urdapilleta, M. R. Trejo-Hernández, *J. Mol. Catal. B- Enzym.* **2015**, *122*, 339.
- [28] O. Fokina, J. Eipper, S. Kerzenmacher, R. Fischer, *Bioresour. Technol.* **2016**, *218*, 455.
- [29] R. Zhuo, P. Yuan, Y. Yang, S. Zhang, F. Ma, X. Zhang, *Biochem. Eng. J.* **2017**, *117*, 62.
- [30] J. Hu, F. Wang, A. Ma, G. Zhuang, Y. Liu, J. Lu, C. Guo, C. Liu, *Eng. Life Sci.* **2016**, *16*, 364.
- [31] J. Yang, T. B. Ng, J. Lin, X. Ye, *Int. J. Biol. Macromol.* **2015**, *77*, 344.
- [32] P. A. Campos, L. N. Levin, S. A. Wirth, *Process Biochem.* **2016**, *51*, 895.
- [33] V. Garrido-Bazán, M. Téllez-Téllez, A. Herrera-Estrella, G. Díaz-Godínez, S. Nava-Galicia, M. Á. Villalobos-López, A. Arroyo-Becerra, M. Bibbins-Martínez, *AMB Express* **2016**, *6*, 93.
- [34] M. Avelar, C. Olvera, D. Aceves-Zamudio, J. L. Folch, M. Ayala, *Protein Expres. Purif.* **2017**, *136*, 14.
- [35] Y. Iimura, T. Sonoki, H. Habe, *Protein Expres. Purif.* **2018**, *141*, 39.
- [36] E. Balcázar-López, L. H. Méndez-Lorenzo, R. A. Batista-García, U. Esquivel-Naranjo, M. Ayala, V. V. Kumar, O. Savary, H. Cabana, A. Herrera-Estrella, J. L. Folch-Mallol, *PloS One* **2016**, *11*, e0147997.
- [37] A. E. Adekunle, F. Wang, J. Hu, A. Ma, C. Guo, G. Zhuang, C.-Z. Liu, *Bioprocess. Biosyst. Eng.* **2015**, *38*, 1973.
- [38] M. R. Z. Passarini, C. A. Ottoni, C. Santos, N. Lima, L. D. Sette, *AMB Express* **2015**, *5*, 19.
- [39] Y. Yang, Z. Guan, Y. Ding, X. Liao, Y. Cai, *Ann. Microbiol.* **2015**, *65*, 575.
- [40] A. Bronikowski, P.-L. Hagedoorn, K. Koschorreck, V. B. Urlacher, *AMB Express* **2017**, *7*, 73.
- [41] P. C. Carvalho, J. S. Fischer, E. I. Chen, J. R. Yates, V. C. Barbosa, *BMC Bioinformatics* **2008**, *9*, 316.
